# Supplementary material for: Versatile coordination chemistry of a bis(methyliminophosphoranyl)pyridine ligand on copper centres
Source: Royal Society of Chemistry journal article supplement (doi:10.1039/c4dt01794c), 2014-07-15
Supplement: c4dt01794c1.pdf [file c4dt01794c1.pdf]

Electronic Supplementary Material:

Versatile Coordination Chemistry of a Bis(methyliminophosphoranyl)pyridine  
Ligand on Copper Centers

Thibault Cheisson and Audrey Auffrant\*

Laboratoire de Chimie Moléculaire, Ecole Polytechnique, UMR CNRS 9168, F-91128

Palaiseau Cedex.

E-mail: [audrey.auffrant@polytechnique.edu](mailto:audrey.auffrant@polytechnique.edu);

## Table of contents

|                                                                     |    |
|---------------------------------------------------------------------|----|
| VT- <sup>31</sup> P NMR Eyring plot for <b>2</b> and <b>4</b> ..... | S3 |
| X-Ray Data.....                                                     | S4 |
| Cyclic voltammogram of LCuBr ( <b>2</b> ).....                      | S6 |
| Computational details.....                                          | S7 |
| References.....                                                     | S7 |

## I. VT-<sup>31</sup>P NMR Eyring plot for **2** and **4**

### 1. Compound **2**

Compound **2** was diluted in THF-d<sup>8</sup>, 7 spectrums of 300 scans were recorded between -30°C and -85°C. Half widths of peaks were determined using the MestReNova software, exchange rates at each temperature were determined using the formula of Takeda and Stejskal:<sup>1</sup>

$$k = \frac{\pi\delta\nu^2(W^* - W_0)\sqrt{1 + 2\left(\frac{W^*}{\delta\nu}\right)^2 - \left(\frac{W^*}{\delta\nu}\right)^4}}{2(W^{*2} - W_0^2)}$$

With :

- $\delta\nu$ : the peak separation after coalescence (in Hz)
- $W^*$  the half width of the peak
- $W_0$  the half width of a reference peak

$\delta\nu = 1807$  Hz for **2**.

Activation parameters were determined by plotting  $\ln\left(\frac{k}{T}\right) = a\left(\frac{1}{T}\right) + b$  :

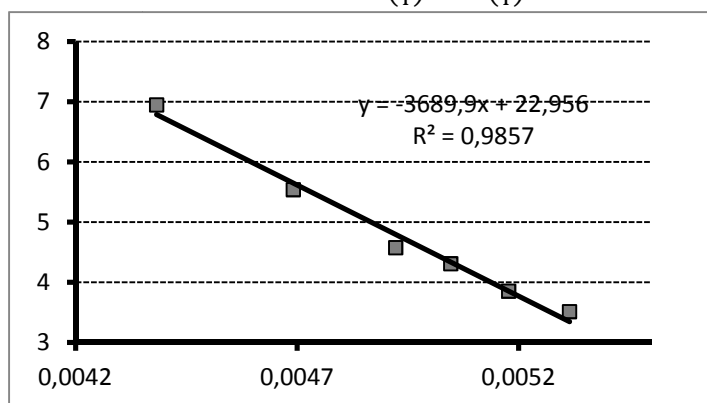

### 2. Compound **4**

Compound **4** was diluted in THF-d<sup>8</sup>, 8 spectrums of 100 scans were recorded between -20°C and -70°C. Half widths of peaks were determined using the MestReNova software, and the same methodology as previously was used.

$\delta\nu = 2521$  Hz for **4**.

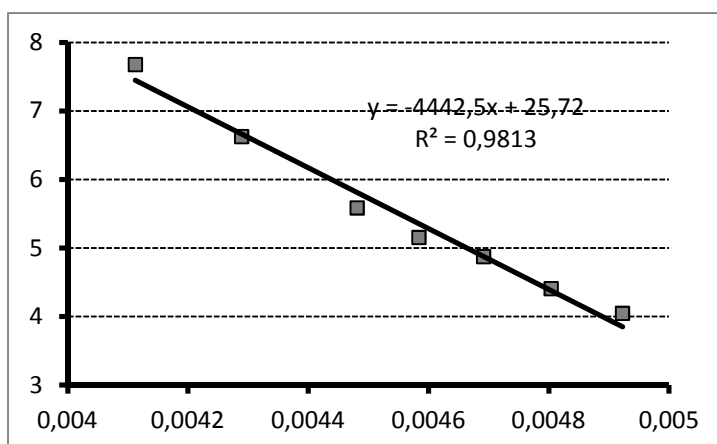

## II. X-Ray Data

Structure of [LCuBr(MeCN)][Ce(NO<sub>3</sub>)<sub>5</sub>] (**6**)

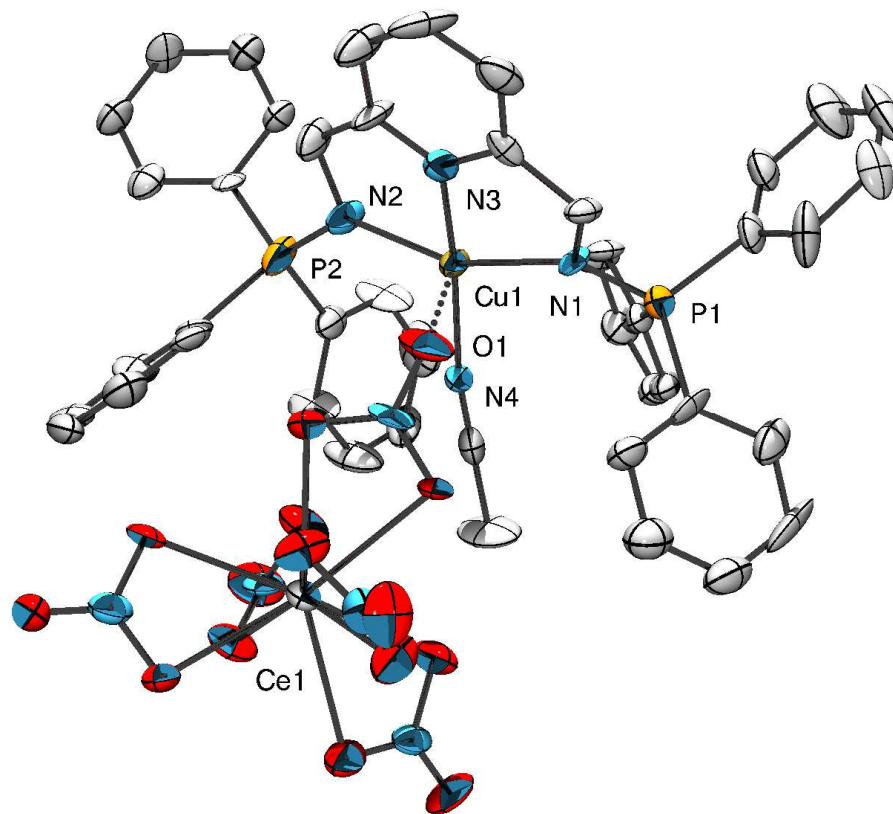

ORTEP of the solid-state structure of **6** with 50% probability thermal ellipsoids. Hydrogens were omitted for clarity. Selected bond lengths [Å] and angles (deg): N1-Cu1 1.97(1), N2-Cu1 1.99(1), N3-Cu1 1.92(1), N4-Cu1 1.93(1), O1-Cu1 2.79(1), P1-N1 1.59(1), P2-N2 1.63(1); N1-Cu1-N3 82.8(5), N2-Cu1-N3 81.1(6), N3-Cu1-N4 160.3(8), N1-Cu1-O1 81.1(5), N2-Cu1-O1 109.8(5), N3-Cu1-O1 76.9(5).

Table S1: Crystal data and refinement details for complexes **2**, **3**, **4**, **5**, **6**

| Compound                      | <b>2</b>                                                                                             | <b>3</b>                                                                                               | <b>4</b>                                                                         | <b>5</b>                                                                                        | <b>6</b>                                                                          |
|-------------------------------|------------------------------------------------------------------------------------------------------|--------------------------------------------------------------------------------------------------------|----------------------------------------------------------------------------------|-------------------------------------------------------------------------------------------------|-----------------------------------------------------------------------------------|
| Formula                       | C <sub>43</sub> H <sub>37</sub> BrCuN <sub>3</sub> P <sub>2</sub> ,<br>C <sub>6</sub> H <sub>6</sub> | C <sub>86</sub> H <sub>74</sub> Cu <sub>2</sub> N <sub>6</sub> P <sub>4</sub> ,<br>2(F <sub>6</sub> P) | C <sub>49</sub> H <sub>52</sub> CuN <sub>3</sub> P <sub>3</sub> F <sub>6</sub> P | C <sub>44</sub> H <sub>37</sub> Br <sub>2</sub> Cl <sub>2</sub> CuN <sub>3</sub> P <sub>2</sub> | C <sub>45</sub> H <sub>40</sub> CeCuN <sub>9</sub> O <sub>15</sub> P <sub>2</sub> |
| M <sub>r</sub>                | 879.25                                                                                               | 1732.41                                                                                                | 984.36                                                                           | 965.98                                                                                          | 1212.46                                                                           |
| Space group                   | P-1                                                                                                  | P-1                                                                                                    | P-1                                                                              | P2 <sub>1</sub> /c                                                                              | Cc                                                                                |
| λ (Å)                         | 0.71069                                                                                              | 0.71069                                                                                                | 0.71069                                                                          | 0.71069                                                                                         | 0.71069                                                                           |
| a(Å)                          | 10.315(1)                                                                                            | 12.216(1)                                                                                              | 10.981(1)                                                                        | 11.030(1)                                                                                       | 21.754(1)                                                                         |
| b(Å)                          | 13.914(1)                                                                                            | 13.441(1)                                                                                              | 14.582(1)                                                                        | 26.032(1)                                                                                       | 21.836(1)                                                                         |
| c(Å)                          | 15.143(1)                                                                                            | 27.368(1)                                                                                              | 16.352(1)                                                                        | 18.0004(10)                                                                                     | 10.390(1)                                                                         |
| α(°)                          | 100.336(1)                                                                                           | 97.350(1)                                                                                              | 70.160(1)                                                                        | 90.00                                                                                           | 90                                                                                |
| β(°)                          | 91.375(1)                                                                                            | 95.160(1)                                                                                              | 71.273(1)                                                                        | 121.879(3)                                                                                      | 93.913(1)                                                                         |
| γ(°)                          | 95.391(1)                                                                                            | 116.043(1)                                                                                             | 77.074(1)                                                                        | 90.00                                                                                           | 90                                                                                |
| V(Å <sup>3</sup> )            | 2126.8(3)                                                                                            | 3950.1(5)                                                                                              | 2313.1(3)                                                                        | 4388.9(5)                                                                                       | 4924.0(6)                                                                         |
| Z                             | 2                                                                                                    | 2                                                                                                      | 2                                                                                | 4                                                                                               | 4                                                                                 |
| d(g cm <sup>-3</sup> )        | 1.373                                                                                                | 1.457                                                                                                  | 1.413                                                                            | 1.462                                                                                           | 1.636                                                                             |
| μ(cm <sup>-1</sup> )          | 1.566                                                                                                | 0.739                                                                                                  | 0.673                                                                            | 2.547                                                                                           | 1.487                                                                             |
| F(000)                        | 904                                                                                                  | 1776                                                                                                   | 1020                                                                             | 1948                                                                                            | 2440                                                                              |
| θmax                          | 30.03                                                                                                | 27.48                                                                                                  | 30.00                                                                            | 27.48                                                                                           | 27.48                                                                             |
| Rfins measd.                  | 17505                                                                                                | 62056                                                                                                  | 27032                                                                            | 30986                                                                                           | 16546                                                                             |
| Unique data                   | 8870                                                                                                 | 18067                                                                                                  | 13347                                                                            | 10014                                                                                           | 8888                                                                              |
| R <sub>int</sub>              | 0.0403                                                                                               | 0.0389                                                                                                 | 0.0493                                                                           | 0.0506                                                                                          | 0.0648                                                                            |
| GoF                           | 1.1068                                                                                               | 1.024                                                                                                  | 1.107                                                                            | 1.038                                                                                           | 1.161                                                                             |
| R <sub>1</sub> <sup>a)</sup>  | 0.0491                                                                                               | 0.0362                                                                                                 | 0.0664                                                                           | 0.0517                                                                                          | 0.0696                                                                            |
| wR <sub>2</sub> <sup>b)</sup> | 0.1146                                                                                               | 0.0948                                                                                                 | 0.1369                                                                           | 0.1093                                                                                          | 0.1503                                                                            |
| CCDC Number                   | 996862                                                                                               | 996863                                                                                                 | 996864                                                                           | 996894                                                                                          | 996866                                                                            |

### III. Cyclic voltammogram of LCuBr (**2**)

The electrochemical experiments were performed using a VERSATAT potentiostat/galvanostat with a three-electrode cell using a Au disk as working electrode, a Pt gauze as the counter electrode, and a Ag/AgNO<sub>3</sub> reference electrode. Measurements were made in THF with a concentration of 3.0 mmol.L<sup>-1</sup> for **2**. Tetrabutylammonium tetrafluoroborate salt served as electrolyte (concentration 0.12 mol.L<sup>-1</sup>). Potentials were recorded at 50 mV s<sup>-1</sup>.

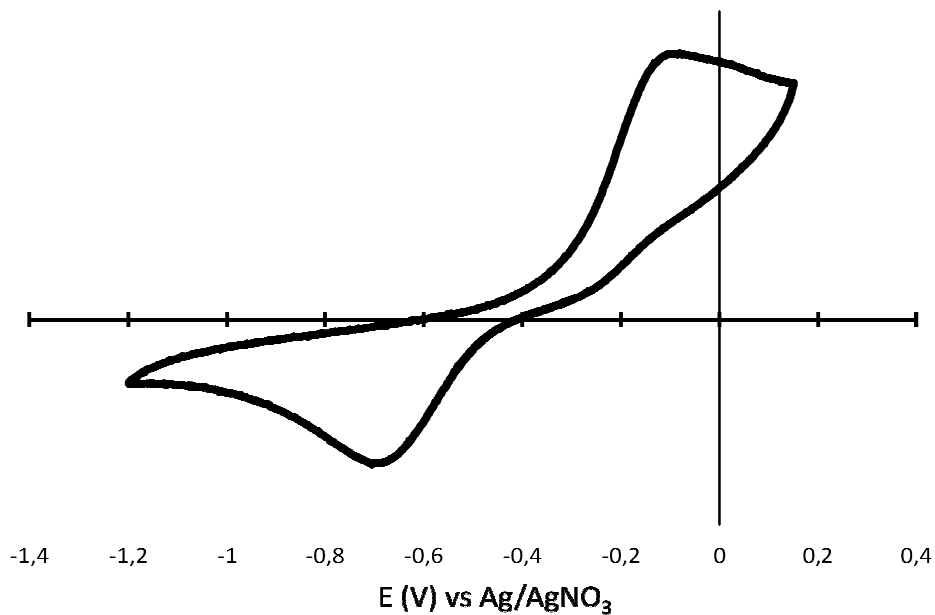

|                    | vs Ag/AgNO <sub>3</sub> | Vs Fc <sup>+</sup> /Fc |
|--------------------|-------------------------|------------------------|
| E <sup>a</sup> , V | -0.13                   | -0.36                  |
| E <sup>c</sup> , V | -0.67                   | -0.90                  |

## IV. Computational details

### General considerations

All calculations were performed using the Gaussian 09 series of programs (revision B.01).<sup>2</sup> The  $\omega$ -B97XD functional was used in combination with the 6-31G\* basis set for carbons and hydrogens; the 6-311+G\*\* basis set for bromine, phosphorus, nitrogen and oxygen; and the Def2-TZVP basis set for copper.<sup>3</sup> The stationary points and transition states were characterised by full vibration frequencies calculations, with no imaginary frequency for minima (stationary point), and one imaginary frequency for transition states. Solvent effects were introduced through PCM single-point calculations,<sup>4</sup> using standard Gaussian parameters, solvent was THF. The PCM Gibbs energies were calculated using the correction proposed by Maseras and coworkers.<sup>5</sup>

#### 1. Figure S1: HOMO-6 orbital of the computed dimer V

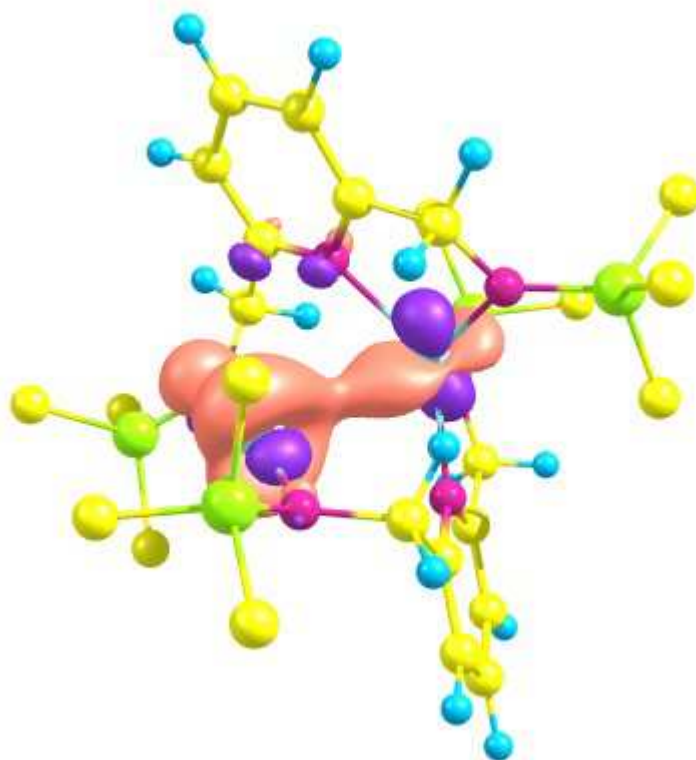

## 2. Energies and three lower frequencies for the hemilability process (in hartrees)

|                     | ZPE          | E            | H            | G            | E PCM        | G PCM        | Freq1<br>(cm <sup>-1</sup> ) | Freq2<br>(cm <sup>-1</sup> ) | Freq3<br>(cm <sup>-1</sup> ) |
|---------------------|--------------|--------------|--------------|--------------|--------------|--------------|------------------------------|------------------------------|------------------------------|
| LCuBr_tri (I)       | -6721,414481 | -6721,369022 | -6721,368078 | -6721,503285 | -6722,138756 | -6722,273019 | 10,06                        | 10,79                        | 12,22                        |
| LCuBr_linear (II)   | -6721,398799 | -6721,353499 | -6721,352554 | -6721,487803 | -6722,120256 | -6722,254560 | 10,27                        | 14,30                        | 15,33                        |
| LCuBr_twisted (III) | -6721,408602 | -6721,363170 | -6721,362226 | -6721,496403 | -6722,133927 | -6722,267160 | 7,37                         | 14,25                        | 17,02                        |
| LCuBr_TS (IV)       | -6721,407121 | -6721,362717 | -6721,361773 | -6721,490913 | -6722,130241 | -6722,258437 | -15,59                       | 10,36                        | 20,64                        |

## 3. Energies and three lower frequencies for the dimerisation process (in hartrees)

|               | ZPE          | E            | H            | G            | E PCM        | G PCM        | Freq1<br>(cm <sup>-1</sup> ) | Freq2<br>(cm <sup>-1</sup> ) | Freq3<br>(cm <sup>-1</sup> ) |
|---------------|--------------|--------------|--------------|--------------|--------------|--------------|------------------------------|------------------------------|------------------------------|
| LCuDimer (V)  | -8294,111587 | -8294,026170 | -8294,025226 | -8294,238637 | -8295,643519 | -8295,855986 | 12,30                        | 17,32                        | 18,78                        |
| LOMePhCN (VI) | -4814,726582 | -4814,669020 | -4814,668076 | -4814,822985 | -4815,672919 | -4815,826884 | 14,45                        | 15,92                        | 19,76                        |
| OMePhCN       | -667,652415  | -667,638661  | -667,637717  | -667,692737  | -667,867089  | -667,921165  | 60,36                        | 75,56                        | 96,81                        |
| LCuMeCN (VII) | -4279,729691 | -4279,682507 | -4279,681562 | -4279,815163 | -4280,521766 | -4280,654422 | 10,22                        | 13,34                        | 24,40                        |
| MeCN          | -132,675831  | -132,672227  | -132,671283  | -132,698814  | -132,729392  | -132,755979  | 381,13                       | 381,35                       | 943,55                       |
| LCu (VIII)    | -4147,030016 | -4146,987721 | -4146,986777 | -4147,108927 | -4147,772981 | -4147,894187 | 14,03                        | 19,33                        | 22,34                        |
| LCuPEt3 (IX)  | -4725,841629 | -4725,787579 | -4725,786634 | -4725,935044 | -4726,774082 | -4726,921547 | 64,68                        | 80,59                        | 83,35                        |
| PEt3          | -578,764199  | -578,753729  | -578,752785  | -578,800104  | -578,944914  | -578,991289  | 39,75                        | 92,82                        | 100,18                       |



#### 4. Optimised geometries

LCuBr\_tri (I)

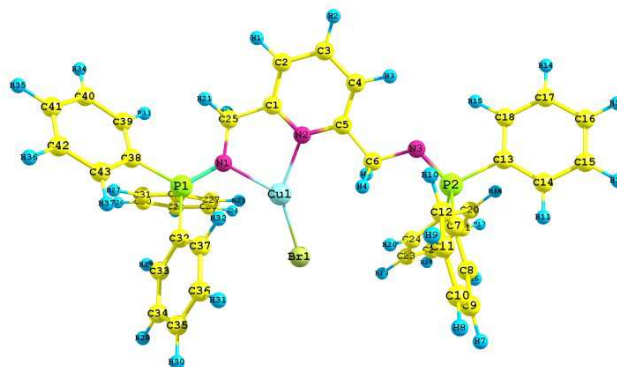

| Center Number | Atomic Number | Atomic Type | Coordinates (Angstroms) |           |           |
|---------------|---------------|-------------|-------------------------|-----------|-----------|
|               |               |             | X                       | Y         | Z         |
| 1             | 35            | 0           | -0.386159               | -2.326011 | -0.287189 |
| 2             | 29            | 0           | -0.961554               | -0.091020 | -0.237085 |
| 3             | 15            | 0           | -4.124450               | 0.246936  | 0.058788  |
| 4             | 15            | 0           | 4.517412                | 0.343615  | -0.005743 |
| 5             | 7             | 0           | -2.733566               | 1.001684  | -0.052189 |
| 6             | 7             | 0           | -0.219986               | 1.832314  | -0.473464 |
| 7             | 7             | 0           | 3.417823                | 1.440006  | -0.263191 |
| 8             | 6             | 0           | -1.155952               | 2.775159  | -0.595542 |
| 9             | 6             | 0           | -0.822472               | 4.123251  | -0.696688 |
| 10            | 1             | 0           | -1.603561               | 4.871800  | -0.789190 |
| 11            | 6             | 0           | 0.520194                | 4.480172  | -0.666147 |
| 12            | 1             | 0           | 0.808327                | 5.525265  | -0.737970 |
| 13            | 6             | 0           | 1.489749                | 3.491747  | -0.535449 |
| 14            | 1             | 0           | 2.551352                | 3.706113  | -0.497230 |
| 15            | 6             | 0           | 1.079815                | 2.167437  | -0.442040 |
| 16            | 6             | 0           | 2.040944                | 1.015132  | -0.299592 |
| 17            | 1             | 0           | 1.727290                | 0.462777  | 0.606634  |
| 18            | 1             | 0           | 1.822655                | 0.328539  | -1.136900 |
| 19            | 6             | 0           | 4.469731                | -0.395304 | 1.666794  |
| 20            | 6             | 0           | 4.878862                | -1.702043 | 1.947072  |
| 21            | 1             | 0           | 5.227871                | -2.346771 | 1.145151  |
| 22            | 6             | 0           | 4.818583                | -2.188713 | 3.250034  |
| 23            | 1             | 0           | 5.131230                | -3.206936 | 3.460924  |
| 24            | 6             | 0           | 4.343724                | -1.375906 | 4.276274  |
| 25            | 1             | 0           | 4.288634                | -1.761111 | 5.290363  |
| 26            | 6             | 0           | 3.928080                | -0.074962 | 4.001519  |
| 27            | 1             | 0           | 3.549277                | 0.556369  | 4.799764  |
| 28            | 6             | 0           | 3.990009                | 0.414625  | 2.700985  |
| 29            | 1             | 0           | 3.657963                | 1.424443  | 2.471928  |
| 30            | 6             | 0           | 6.136454                | 1.131893  | -0.179169 |
| 31            | 6             | 0           | 7.282878                | 0.561648  | 0.380558  |
| 32            | 1             | 0           | 7.208616                | -0.352511 | 0.963651  |
| 33            | 6             | 0           | 8.521536                | 1.169166  | 0.199950  |
| 34            | 1             | 0           | 9.410234                | 0.724833  | 0.637748  |
| 35            | 6             | 0           | 8.617427                | 2.348538  | -0.535427 |
| 36            | 1             | 0           | 9.584396                | 2.823564  | -0.673506 |
| 37            | 6             | 0           | 7.474937                | 2.921308  | -1.089343 |
| 38            | 1             | 0           | 7.549815                | 3.844098  | -1.656919 |
| 39            | 6             | 0           | 6.234463                | 2.315214  | -0.914923 |
| 40            | 1             | 0           | 5.330292                | 2.747549  | -1.332268 |
| 41            | 6             | 0           | 4.489459                | -1.092428 | -1.127128 |
| 42            | 6             | 0           | 5.448239                | -1.267538 | -2.130238 |
| 43            | 1             | 0           | 6.295435                | -0.590675 | -2.197985 |
| 44            | 6             | 0           | 5.319672                | -2.309749 | -3.044161 |
| 45            | 1             | 0           | 6.071856                | -2.444962 | -3.815991 |
| 46            | 6             | 0           | 4.227147                | -3.171252 | -2.972735 |
| 47            | 1             | 0           | 4.125092                | -3.976782 | -3.694320 |

|    |   |   |           |           |           |
|----|---|---|-----------|-----------|-----------|
| 48 | 6 | 0 | 3.262310  | -2.996135 | -1.983186 |
| 49 | 1 | 0 | 2.395360  | -3.647067 | -1.925836 |
| 50 | 6 | 0 | 3.394371  | -1.965128 | -1.059035 |
| 51 | 1 | 0 | 2.627663  | -1.849912 | -0.295887 |
| 52 | 6 | 0 | -2.598590 | 2.305130  | -0.660735 |
| 53 | 1 | 0 | -3.229538 | 3.062829  | -0.170281 |
| 54 | 1 | 0 | -2.884809 | 2.304002  | -1.729134 |
| 55 | 6 | 0 | -4.719140 | -0.544661 | -1.471045 |
| 56 | 6 | 0 | -3.761138 | -1.070971 | -2.344936 |
| 57 | 1 | 0 | -2.702893 | -0.985751 | -2.109923 |
| 58 | 6 | 0 | -4.163555 | -1.728545 | -3.503109 |
| 59 | 1 | 0 | -3.414468 | -2.136174 | -4.174413 |
| 60 | 6 | 0 | -5.518511 | -1.869857 | -3.792198 |
| 61 | 1 | 0 | -5.829686 | -2.385615 | -4.695911 |
| 62 | 6 | 0 | -6.476410 | -1.354651 | -2.921732 |
| 63 | 1 | 0 | -7.533346 | -1.468482 | -3.143059 |
| 64 | 6 | 0 | -6.079810 | -0.692187 | -1.763954 |
| 65 | 1 | 0 | -6.830646 | -0.291189 | -1.088620 |
| 66 | 6 | 0 | -3.949743 | -1.054535 | 1.295224  |
| 67 | 6 | 0 | -4.711536 | -2.223064 | 1.225866  |
| 68 | 1 | 0 | -5.404612 | -2.378730 | 0.404136  |
| 69 | 6 | 0 | -4.564078 | -3.203939 | 2.201319  |
| 70 | 1 | 0 | -5.146789 | -4.117703 | 2.139640  |
| 71 | 6 | 0 | -3.654558 | -3.022501 | 3.239826  |
| 72 | 1 | 0 | -3.530868 | -3.795919 | 3.991974  |
| 73 | 6 | 0 | -2.892642 | -1.858619 | 3.308392  |
| 74 | 1 | 0 | -2.168934 | -1.725614 | 4.106096  |
| 75 | 6 | 0 | -3.038379 | -0.873023 | 2.339456  |
| 76 | 1 | 0 | -2.430691 | 0.026021  | 2.368555  |
| 77 | 6 | 0 | -5.492550 | 1.331557  | 0.583511  |
| 78 | 6 | 0 | -5.974629 | 2.302464  | -0.304421 |
| 79 | 1 | 0 | -5.588748 | 2.349328  | -1.320064 |
| 80 | 6 | 0 | -6.957122 | 3.198791  | 0.100876  |
| 81 | 1 | 0 | -7.325580 | 3.946823  | -0.594482 |
| 82 | 6 | 0 | -7.468953 | 3.131954  | 1.395366  |
| 83 | 1 | 0 | -8.237974 | 3.830650  | 1.710871  |
| 84 | 6 | 0 | -6.995203 | 2.170282  | 2.283124  |
| 85 | 1 | 0 | -7.396286 | 2.113773  | 3.290422  |
| 86 | 6 | 0 | -6.007909 | 1.273869  | 1.881401  |
| 87 | 1 | 0 | -5.641847 | 0.525035  | 2.577646  |

-----  
PCM: SCF Done: E(RwB97XD) = -6722.13875574      A.U. after 19 cycles  
Convq = 0.3588D-08                              -V/T = 2.0026

LCuBr\_linear (II)

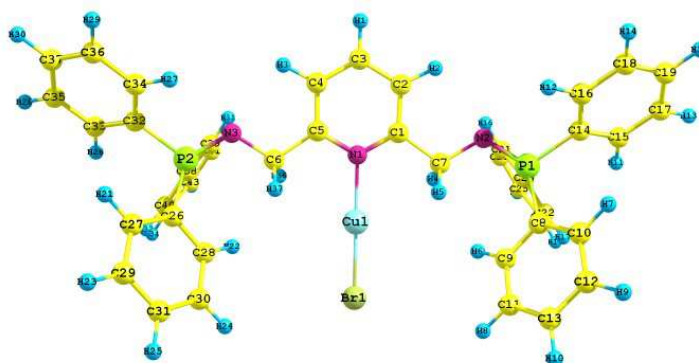

| Center Number | Atomic Number | Atomic Type | Coordinates (Angstroms) |           |           |
|---------------|---------------|-------------|-------------------------|-----------|-----------|
|               |               |             | X                       | Y         | Z         |
| 1             | 6             | 0           | 1.166542                | -1.486709 | -0.319233 |
| 2             | 6             | 0           | 1.203289                | -2.864426 | -0.479394 |
| 3             | 6             | 0           | 0.000012                | -3.556768 | -0.564345 |
| 4             | 6             | 0           | -1.203268               | -2.864430 | -0.479396 |
| 5             | 6             | 0           | -1.166528               | -1.486714 | -0.319235 |
| 6             | 7             | 0           | 0.000006                | -0.820503 | -0.249406 |
| 7             | 1             | 0           | 0.000014                | -4.635374 | -0.694969 |
| 8             | 1             | 0           | 2.172049                | -3.346957 | -0.535383 |
| 9             | 1             | 0           | -2.172026               | -3.346965 | -0.535385 |
| 10            | 6             | 0           | -2.403380               | -0.631559 | -0.196227 |
| 11            | 6             | 0           | 2.403390                | -0.631550 | -0.196217 |
| 12            | 1             | 0           | 2.319838                | -0.128213 | 0.788884  |
| 13            | 1             | 0           | 2.299082                | 0.174789  | -0.946944 |
| 14            | 7             | 0           | 3.625503                | -1.372348 | -0.353871 |
| 15            | 7             | 0           | -3.625489               | -1.372363 | -0.353885 |
| 16            | 15            | 0           | 4.970813                | -0.597597 | -0.078557 |
| 17            | 15            | 0           | -4.970798               | -0.597610 | -0.078563 |
| 18            | 6             | 0           | 5.146072                | 0.992568  | -0.952674 |
| 19            | 6             | 0           | 4.291288                | 2.048009  | -0.601940 |
| 20            | 6             | 0           | 6.003303                | 1.139788  | -2.047215 |
| 21            | 6             | 0           | 4.291304                | 3.227387  | -1.338668 |
| 22            | 1             | 0           | 3.616961                | 1.958520  | 0.246418  |
| 23            | 6             | 0           | 6.013186                | 2.328579  | -2.772440 |
| 24            | 1             | 0           | 6.665574                | 0.327511  | -2.333427 |
| 25            | 6             | 0           | 5.155866                | 3.368433  | -2.422315 |
| 26            | 1             | 0           | 3.606371                | 4.024403  | -1.067028 |
| 27            | 1             | 0           | 6.689060                | 2.439064  | -3.615216 |
| 28            | 1             | 0           | 5.157643                | 4.290268  | -2.996446 |
| 29            | 6             | 0           | 6.343115                | -1.656899 | -0.588921 |
| 30            | 6             | 0           | 7.625666                | -1.484622 | -0.061060 |
| 31            | 6             | 0           | 6.111191                | -2.640198 | -1.554319 |
| 32            | 6             | 0           | 8.671742                | -2.289637 | -0.500643 |
| 33            | 1             | 0           | 7.806851                | -0.730656 | 0.700187  |
| 34            | 6             | 0           | 7.160753                | -3.444321 | -1.988302 |
| 35            | 1             | 0           | 5.105692                | -2.767290 | -1.943757 |
| 36            | 6             | 0           | 8.439451                | -3.268517 | -1.464193 |
| 37            | 1             | 0           | 9.666016                | -2.156844 | -0.085233 |
| 38            | 1             | 0           | 6.979607                | -4.210578 | -2.735977 |
| 39            | 1             | 0           | 9.256177                | -3.898756 | -1.803864 |
| 40            | 6             | 0           | 5.253434                | -0.177786 | 1.677621  |
| 41            | 6             | 0           | 4.694142                | -1.034544 | 2.630944  |
| 42            | 6             | 0           | 5.999845                | 0.928474  | 2.094609  |
| 43            | 6             | 0           | 4.888950                | -0.792971 | 3.986976  |
| 44            | 1             | 0           | 4.102358                | -1.883620 | 2.297205  |
| 45            | 6             | 0           | 6.196311                | 1.165483  | 3.452177  |
| 46            | 1             | 0           | 6.416098                | 1.612229  | 1.359638  |
| 47            | 6             | 0           | 5.642618                | 0.304671  | 4.396960  |
| 48            | 1             | 0           | 4.450403                | -1.458703 | 4.724149  |
| 49            | 1             | 0           | 6.774480                | 2.027007  | 3.772317  |
| 50            | 1             | 0           | 5.793293                | 0.493944  | 5.455674  |
| 51            | 6             | 0           | -5.146058               | 0.992554  | -0.952679 |
| 52            | 6             | 0           | -6.003307               | 1.139785  | -2.047204 |
| 53            | 6             | 0           | -4.291251               | 2.047984  | -0.601963 |

|    |    |   |           |           |           |
|----|----|---|-----------|-----------|-----------|
| 54 | 6  | 0 | -6.013190 | 2.328578  | -2.772426 |
| 55 | 1  | 0 | -6.665592 | 0.327516  | -2.333404 |
| 56 | 6  | 0 | -4.291267 | 3.227363  | -1.338689 |
| 57 | 1  | 0 | -3.616904 | 1.958485  | 0.246379  |
| 58 | 6  | 0 | -5.155851 | 3.368422  | -2.422317 |
| 59 | 1  | 0 | -6.689080 | 2.439072  | -3.615188 |
| 60 | 1  | 0 | -3.606317 | 4.024368  | -1.067062 |
| 61 | 1  | 0 | -5.157628 | 4.290257  | -2.996447 |
| 62 | 6  | 0 | -6.343104 | -1.656913 | -0.588918 |
| 63 | 6  | 0 | -7.625653 | -1.484625 | -0.061054 |
| 64 | 6  | 0 | -6.111185 | -2.640221 | -1.554306 |
| 65 | 6  | 0 | -8.671733 | -2.289641 | -0.500627 |
| 66 | 1  | 0 | -7.806832 | -0.730652 | 0.700186  |
| 67 | 6  | 0 | -7.160752 | -3.444344 | -1.988279 |
| 68 | 1  | 0 | -5.105688 | -2.767317 | -1.943746 |
| 69 | 6  | 0 | -8.439448 | -3.268530 | -1.464169 |
| 70 | 1  | 0 | -9.666005 | -2.156842 | -0.085215 |
| 71 | 1  | 0 | -6.979610 | -4.210607 | -2.735949 |
| 72 | 1  | 0 | -9.256176 | -3.898771 | -1.803831 |
| 73 | 6  | 0 | -5.253411 | -0.177793 | 1.677615  |
| 74 | 6  | 0 | -4.694130 | -1.034554 | 2.630943  |
| 75 | 6  | 0 | -5.999811 | 0.928475  | 2.094598  |
| 76 | 6  | 0 | -4.888939 | -0.792974 | 3.986973  |
| 77 | 1  | 0 | -4.102354 | -1.883638 | 2.297209  |
| 78 | 6  | 0 | -6.196279 | 1.165491  | 3.452165  |
| 79 | 1  | 0 | -6.416056 | 1.612231  | 1.359624  |
| 80 | 6  | 0 | -5.642597 | 0.304677  | 4.396952  |
| 81 | 1  | 0 | -4.450401 | -1.458709 | 4.724150  |
| 82 | 1  | 0 | -6.774439 | 2.027021  | 3.772300  |
| 83 | 1  | 0 | -5.793274 | 0.493954  | 5.455665  |
| 84 | 1  | 0 | -2.319836 | -0.128218 | 0.788873  |
| 85 | 1  | 0 | -2.299073 | 0.174777  | -0.946956 |
| 86 | 29 | 0 | -0.000007 | 1.127967  | -0.097631 |
| 87 | 35 | 0 | -0.000069 | 3.366972  | 0.056738  |

-----  
PCM: SCF Done: E(RwB97XD) = -6722.12025558 A.U. after 18 cycles  
Convg = 0.3650D-08 -V/T = 2.0026

LCuBr\_twisted (III)

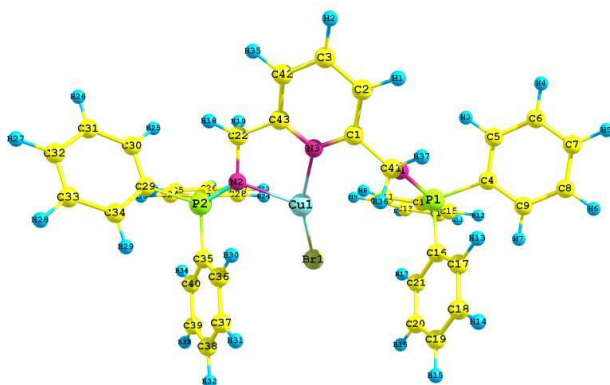

| Center Number | Atomic Number | Atomic Type | Coordinates (Angstroms) |           |           |
|---------------|---------------|-------------|-------------------------|-----------|-----------|
|               |               |             | X                       | Y         | Z         |
| 1             | 29            | 0           | 0.461464                | 0.292143  | -0.300215 |
| 2             | 15            | 0           | -3.883781               | 0.198000  | 0.130669  |
| 3             | 15            | 0           | 3.747527                | 0.139792  | 0.009892  |
| 4             | 7             | 0           | -2.711031               | 1.236258  | 0.245896  |
| 5             | 7             | 0           | 2.475370                | 1.072668  | -0.145766 |
| 6             | 7             | 0           | 0.069556                | 2.306715  | -0.223056 |
| 7             | 6             | 0           | -1.119536               | 2.882720  | -0.470939 |
| 8             | 6             | 0           | -1.307374               | 4.250974  | -0.311090 |
| 9             | 1             | 0           | -2.281718               | 4.682963  | -0.513570 |
| 10            | 6             | 0           | -0.243873               | 5.040285  | 0.111690  |
| 11            | 1             | 0           | -0.368253               | 6.111097  | 0.243189  |
| 12            | 6             | 0           | -5.557084               | 0.951770  | 0.105081  |
| 13            | 6             | 0           | -5.689802               | 2.211971  | 0.695296  |
| 14            | 1             | 0           | -4.807620               | 2.689014  | 1.115936  |
| 15            | 6             | 0           | -6.931765               | 2.838596  | 0.741751  |
| 16            | 1             | 0           | -7.028394               | 3.817492  | 1.202149  |
| 17            | 6             | 0           | -8.049862               | 2.209952  | 0.198683  |
| 18            | 1             | 0           | -9.019268               | 2.698541  | 0.234677  |
| 19            | 6             | 0           | -7.924672               | 0.955277  | -0.393910 |
| 20            | 1             | 0           | -8.794604               | 0.466438  | -0.822648 |
| 21            | 6             | 0           | -6.682731               | 0.328782  | -0.443915 |
| 22            | 1             | 0           | -6.586294               | -0.642942 | -0.921094 |
| 23            | 6             | 0           | -3.833499               | -0.870051 | 1.588360  |
| 24            | 6             | 0           | -2.606324               | -1.049472 | 2.230855  |
| 25            | 1             | 0           | -1.732744               | -0.525380 | 1.858209  |
| 26            | 6             | 0           | -2.518890               | -1.912727 | 3.319086  |
| 27            | 1             | 0           | -1.560803               | -2.061095 | 3.807688  |
| 28            | 6             | 0           | -3.648133               | -2.592241 | 3.767474  |
| 29            | 1             | 0           | -3.575225               | -3.268393 | 4.614697  |
| 30            | 6             | 0           | -4.874013               | -2.409917 | 3.129872  |
| 31            | 1             | 0           | -5.756916               | -2.934611 | 3.482512  |
| 32            | 6             | 0           | -4.968081               | -1.550055 | 2.040716  |
| 33            | 1             | 0           | -5.926867               | -1.405064 | 1.550468  |
| 34            | 6             | 0           | -3.872393               | -0.875930 | -1.341780 |
| 35            | 6             | 0           | -4.257037               | -0.345032 | -2.580365 |
| 36            | 1             | 0           | -4.662239               | 0.662800  | -2.639098 |
| 37            | 6             | 0           | -4.140012               | -1.106012 | -3.737931 |
| 38            | 1             | 0           | -4.442929               | -0.687834 | -4.693345 |
| 39            | 6             | 0           | -3.632109               | -2.402328 | -3.667220 |
| 40            | 1             | 0           | -3.536481               | -2.996302 | -4.571669 |
| 41            | 6             | 0           | -3.239582               | -2.931683 | -2.442000 |
| 42            | 1             | 0           | -2.822805               | -3.932102 | -2.384349 |
| 43            | 6             | 0           | -3.354450               | -2.171389 | -1.281159 |
| 44            | 1             | 0           | -3.016196               | -2.580659 | -0.335246 |
| 45            | 6             | 0           | 2.415821                | 2.368136  | 0.478300  |
| 46            | 1             | 0           | 3.223636                | 3.038984  | 0.141869  |
| 47            | 1             | 0           | 2.499809                | 2.313789  | 1.580815  |
| 48            | 6             | 0           | 3.960636                | -0.621871 | 1.651845  |
| 49            | 6             | 0           | 5.215192                | -0.897330 | 2.207630  |
| 50            | 1             | 0           | 6.121231                | -0.633110 | 1.669305  |
| 51            | 6             | 0           | 5.307663                | -1.509186 | 3.454229  |
| 52            | 1             | 0           | 6.283313                | -1.717416 | 3.882923  |

|    |    |   |           |           |           |
|----|----|---|-----------|-----------|-----------|
| 53 | 6  | 0 | 4.149773  | -1.849286 | 4.150289  |
| 54 | 1  | 0 | 4.223950  | -2.326217 | 5.123247  |
| 55 | 6  | 0 | 2.899473  | -1.583720 | 3.597704  |
| 56 | 1  | 0 | 1.995084  | -1.858262 | 4.131661  |
| 57 | 6  | 0 | 2.800540  | -0.972434 | 2.351843  |
| 58 | 1  | 0 | 1.824605  | -0.793378 | 1.908456  |
| 59 | 6  | 0 | 5.323417  | 1.004930  | -0.310151 |
| 60 | 6  | 0 | 5.799964  | 1.942507  | 0.615920  |
| 61 | 1  | 0 | 5.283789  | 2.081674  | 1.562914  |
| 62 | 6  | 0 | 6.944678  | 2.683186  | 0.341568  |
| 63 | 1  | 0 | 7.307729  | 3.404855  | 1.067084  |
| 64 | 6  | 0 | 7.623993  | 2.495755  | -0.860537 |
| 65 | 1  | 0 | 8.519965  | 3.071374  | -1.073288 |
| 66 | 6  | 0 | 7.156090  | 1.568003  | -1.786603 |
| 67 | 1  | 0 | 7.683876  | 1.418357  | -2.723527 |
| 68 | 6  | 0 | 6.008889  | 0.826971  | -1.515403 |
| 69 | 1  | 0 | 5.648877  | 0.104152  | -2.241422 |
| 70 | 6  | 0 | 3.616566  | -1.190790 | -1.196977 |
| 71 | 6  | 0 | 2.965143  | -0.940512 | -2.407493 |
| 72 | 1  | 0 | 2.510025  | 0.030074  | -2.577891 |
| 73 | 6  | 0 | 2.872588  | -1.945571 | -3.362473 |
| 74 | 1  | 0 | 2.351768  | -1.755780 | -4.295520 |
| 75 | 6  | 0 | 3.428049  | -3.198273 | -3.112858 |
| 76 | 1  | 0 | 3.346581  | -3.984877 | -3.857087 |
| 77 | 6  | 0 | 4.075271  | -3.449062 | -1.905967 |
| 78 | 1  | 0 | 4.496363  | -4.429371 | -1.705954 |
| 79 | 6  | 0 | 4.170031  | -2.447318 | -0.945434 |
| 80 | 1  | 0 | 4.654277  | -2.652927 | 0.004856  |
| 81 | 6  | 0 | -2.256730 | 1.985242  | -0.897959 |
| 82 | 6  | 0 | 0.978715  | 4.436203  | 0.357054  |
| 83 | 1  | 0 | 1.839716  | 5.013792  | 0.679791  |
| 84 | 6  | 0 | 1.098597  | 3.059000  | 0.179262  |
| 85 | 1  | 0 | -1.888167 | 1.333015  | -1.710274 |
| 86 | 1  | 0 | -3.037395 | 2.631742  | -1.340127 |
| 87 | 35 | 0 | 0.063874  | -1.986896 | -0.230060 |

-----  
PCM: SCF Done: E(RwB97XD) = -6722.13392695      A.U. after 19 cycles  
          Convg = 0.3049D-08                      -V/T = 2.0026

LCuBr\_TS (TS IV)

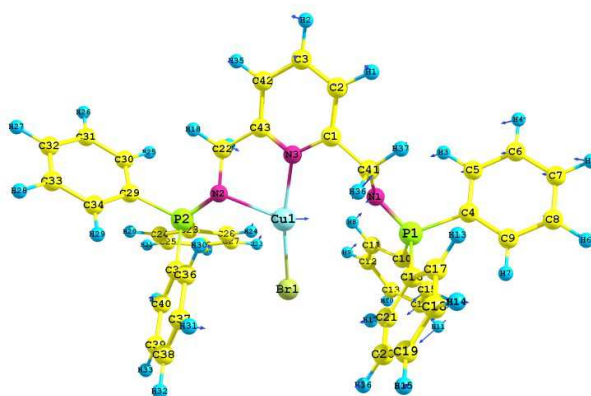

| Center Number | Atomic Number | Atomic Type | Coordinates (Angstroms) |           |           |
|---------------|---------------|-------------|-------------------------|-----------|-----------|
|               |               |             | X                       | Y         | Z         |
| 1             | 29            | 0           | -0.029620               | 0.390264  | 0.056301  |
| 2             | 15            | 0           | 3.640847                | 0.116866  | -0.069958 |
| 3             | 15            | 0           | -3.596884               | 0.111732  | 0.011408  |
| 4             | 7             | 0           | 2.461435                | 1.150490  | -0.238192 |
| 5             | 7             | 0           | -2.353067               | 1.080435  | 0.073487  |
| 6             | 7             | 0           | 0.004089                | 2.444664  | 0.044005  |
| 7             | 6             | 0           | 1.145471                | 3.102683  | 0.297826  |
| 8             | 6             | 0           | 1.217924                | 4.489255  | 0.236034  |
| 9             | 1             | 0           | 2.158809                | 4.988515  | 0.443677  |
| 10            | 6             | 0           | 0.078116                | 5.210467  | -0.101796 |
| 11            | 1             | 0           | 0.107551                | 6.294619  | -0.160791 |
| 12            | 6             | 0           | 5.296331                | 0.850889  | -0.362790 |
| 13            | 6             | 0           | 5.346605                | 1.984944  | -1.179087 |
| 14            | 1             | 0           | 4.418507                | 2.395784  | -1.569786 |
| 15            | 6             | 0           | 6.569218                | 2.572182  | -1.491198 |
| 16            | 1             | 0           | 6.599995                | 3.454379  | -2.123914 |
| 17            | 6             | 0           | 7.750491                | 2.027013  | -0.994613 |
| 18            | 1             | 0           | 8.704901                | 2.485340  | -1.236796 |
| 19            | 6             | 0           | 7.708496                | 0.893575  | -0.185553 |
| 20            | 1             | 0           | 8.628349                | 0.466503  | 0.202896  |
| 21            | 6             | 0           | 6.486453                | 0.307619  | 0.130588  |
| 22            | 1             | 0           | 6.460181                | -0.568378 | 0.773134  |
| 23            | 6             | 0           | 3.459441                | -1.163354 | -1.327249 |
| 24            | 6             | 0           | 2.485029                | -1.017264 | -2.313907 |
| 25            | 1             | 0           | 1.823176                | -0.158491 | -2.278686 |
| 26            | 6             | 0           | 2.359748                | -1.984293 | -3.306131 |
| 27            | 1             | 0           | 1.592177                | -1.877586 | -4.066417 |
| 28            | 6             | 0           | 3.199710                | -3.094014 | -3.312630 |
| 29            | 1             | 0           | 3.092878                | -3.851798 | -4.083400 |
| 30            | 6             | 0           | 4.175661                | -3.239326 | -2.328259 |
| 31            | 1             | 0           | 4.830349                | -4.105538 | -2.330425 |
| 32            | 6             | 0           | 4.308952                | -2.272677 | -1.338161 |
| 33            | 1             | 0           | 5.067258                | -2.390490 | -0.567978 |
| 34            | 6             | 0           | 3.776199                | -0.680779 | 1.561666  |
| 35            | 6             | 0           | 4.387547                | 0.005680  | 2.619374  |
| 36            | 1             | 0           | 4.889171                | 0.953404  | 2.438437  |
| 37            | 6             | 0           | 4.369693                | -0.525890 | 3.904871  |
| 38            | 1             | 0           | 4.850026                | 0.009410  | 4.718627  |
| 39            | 6             | 0           | 3.736231                | -1.743597 | 4.143928  |
| 40            | 1             | 0           | 3.723116                | -2.160500 | 5.146930  |
| 41            | 6             | 0           | 3.112600                | -2.421775 | 3.100173  |
| 42            | 1             | 0           | 2.601847                | -3.361771 | 3.283930  |
| 43            | 6             | 0           | 3.124331                | -1.892210 | 1.813300  |
| 44            | 1             | 0           | 2.597883                | -2.405531 | 1.014690  |
| 45            | 6             | 0           | -2.351314               | 2.343897  | -0.605286 |
| 46            | 1             | 0           | -3.212683               | 2.981171  | -0.340096 |
| 47            | 1             | 0           | -2.379415               | 2.238841  | -1.708446 |
| 48            | 6             | 0           | -3.858260               | -0.738444 | -1.581913 |
| 49            | 6             | 0           | -5.116481               | -1.163943 | -2.023651 |
| 50            | 1             | 0           | -6.001473               | -0.966377 | -1.424492 |
| 51            | 6             | 0           | -5.240947               | -1.836036 | -3.235738 |
| 52            | 1             | 0           | -6.219338               | -2.164832 | -3.573657 |

|    |    |   |           |           |           |
|----|----|---|-----------|-----------|-----------|
| 53 | 6  | 0 | -4.111711 | -2.084521 | -4.013702 |
| 54 | 1  | 0 | -4.211200 | -2.608601 | -4.959887 |
| 55 | 6  | 0 | -2.858449 | -1.662464 | -3.578585 |
| 56 | 1  | 0 | -1.974522 | -1.864240 | -4.175703 |
| 57 | 6  | 0 | -2.728708 | -0.991941 | -2.366079 |
| 58 | 1  | 0 | -1.748671 | -0.689848 | -2.008493 |
| 59 | 6  | 0 | -5.197018 | 0.938074  | 0.334967  |
| 60 | 6  | 0 | -5.738853 | 1.791952  | -0.634974 |
| 61 | 1  | 0 | -5.260802 | 1.879218  | -1.607994 |
| 62 | 6  | 0 | -6.897352 | 2.514754  | -0.370038 |
| 63 | 1  | 0 | -7.309716 | 3.172434  | -1.129457 |
| 64 | 6  | 0 | -7.527475 | 2.391018  | 0.866499  |
| 65 | 1  | 0 | -8.435430 | 2.950494  | 1.071810  |
| 66 | 6  | 0 | -6.995084 | 1.546461  | 1.836605  |
| 67 | 1  | 0 | -7.485825 | 1.444951  | 2.799880  |
| 68 | 6  | 0 | -5.832099 | 0.826636  | 1.575299  |
| 69 | 1  | 0 | -5.421058 | 0.169193  | 2.335849  |
| 70 | 6  | 0 | -3.398064 | -1.144681 | 1.288586  |
| 71 | 6  | 0 | -2.649564 | -0.830685 | 2.424995  |
| 72 | 1  | 0 | -2.160631 | 0.136137  | 2.487849  |
| 73 | 6  | 0 | -2.506478 | -1.771920 | 3.438030  |
| 74 | 1  | 0 | -1.911599 | -1.533147 | 4.314196  |
| 75 | 6  | 0 | -3.105216 | -3.023668 | 3.317880  |
| 76 | 1  | 0 | -2.983788 | -3.761209 | 4.105988  |
| 77 | 6  | 0 | -3.848377 | -3.338284 | 2.182906  |
| 78 | 1  | 0 | -4.303206 | -4.318821 | 2.081524  |
| 79 | 6  | 0 | -3.995386 | -2.399989 | 1.166559  |
| 80 | 1  | 0 | -4.553033 | -2.657185 | 0.270463  |
| 81 | 6  | 0 | 2.348131  | 2.264566  | 0.668102  |
| 82 | 6  | 0 | -1.094933 | 4.520796  | -0.364573 |
| 83 | 1  | 0 | -2.009243 | 5.042992  | -0.629172 |
| 84 | 6  | 0 | -1.096473 | 3.128613  | -0.281573 |
| 85 | 1  | 0 | 2.209611  | 1.942074  | 1.718548  |
| 86 | 1  | 0 | 3.231887  | 2.927261  | 0.666143  |
| 87 | 35 | 0 | -0.067387 | -1.945716 | 0.072207  |

-----  
PCM: SCF Done: E(RwB97XD) = -6722.13024142      A.U. after 19 cycles  
          Convg = 0.4260D-08                      -V/T = 2.0026



LCu\_dimer (V)

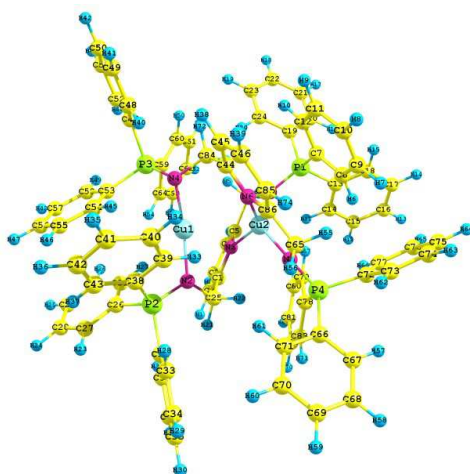

| Center Number | Atomic Number | Atomic Type | Coordinates (Angstroms) |           |           |
|---------------|---------------|-------------|-------------------------|-----------|-----------|
|               |               |             | X                       | Y         | Z         |
| 1             | 29            | 0           | 1.725926                | -0.038550 | 0.159002  |
| 2             | 29            | 0           | -1.153067               | -0.018863 | 0.069583  |
| 3             | 15            | 0           | -3.223608               | -2.522643 | -0.272283 |
| 4             | 15            | 0           | 3.097948                | 2.618928  | -0.156179 |
| 5             | 15            | 0           | 2.938731                | -2.838351 | 0.195263  |
| 6             | 15            | 0           | -2.922066               | 2.781338  | 0.253355  |
| 7             | 7             | 0           | -1.934407               | -1.753716 | -0.797743 |
| 8             | 7             | 0           | 1.750636                | 1.795475  | -0.435094 |
| 9             | 7             | 0           | -0.214510               | 0.078148  | -1.861511 |
| 10            | 7             | 0           | 1.924086                | -1.802847 | 0.896941  |
| 11            | 7             | 0           | -1.898605               | 1.735284  | 0.905539  |
| 12            | 7             | 0           | -0.510221               | -0.319789 | 2.062122  |
| 13            | 6             | 0           | 0.392437                | 1.158083  | -2.380168 |
| 14            | 6             | 0           | 0.672866                | 1.255973  | -3.736999 |
| 15            | 1             | 0           | 1.160369                | 2.142823  | -4.128192 |
| 16            | 6             | 0           | 0.300148                | 0.210842  | -4.577586 |
| 17            | 1             | 0           | 0.491939                | 0.267826  | -5.644797 |
| 18            | 6             | 0           | -0.334753               | -0.895502 | -4.032388 |
| 19            | 1             | 0           | -0.649324               | -1.726219 | -4.656459 |
| 20            | 6             | 0           | -0.572402               | -0.931150 | -2.659191 |
| 21            | 6             | 0           | -1.221026               | -2.133147 | -2.002968 |
| 22            | 1             | 0           | -1.840757               | -2.644045 | -2.754346 |
| 23            | 1             | 0           | -0.406538               | -2.837173 | -1.766219 |
| 24            | 6             | 0           | -3.436015               | -2.156050 | 1.486750  |
| 25            | 6             | 0           | -4.118498               | -0.999795 | 1.879835  |
| 26            | 1             | 0           | -4.565686               | -0.343118 | 1.140488  |
| 27            | 6             | 0           | -4.238477               | -0.687907 | 3.229735  |
| 28            | 1             | 0           | -4.791270               | 0.198980  | 3.523519  |
| 29            | 6             | 0           | -3.661454               | -1.512965 | 4.192165  |
| 30            | 1             | 0           | -3.760068               | -1.270562 | 5.245773  |
| 31            | 6             | 0           | -2.974022               | -2.660556 | 3.804780  |
| 32            | 1             | 0           | -2.533565               | -3.311736 | 4.552896  |
| 33            | 6             | 0           | -2.867461               | -2.986761 | 2.456697  |
| 34            | 1             | 0           | -2.351152               | -3.896963 | 2.167172  |
| 35            | 6             | 0           | -4.790352               | -2.039565 | -1.066703 |
| 36            | 6             | 0           | -4.735605               | -1.460153 | -2.336395 |
| 37            | 1             | 0           | -3.773225               | -1.306045 | -2.815496 |
| 38            | 6             | 0           | -5.903300               | -1.070037 | -2.985267 |
| 39            | 1             | 0           | -5.850846               | -0.612012 | -3.967937 |
| 40            | 6             | 0           | -7.137131               | -1.271735 | -2.371336 |
| 41            | 1             | 0           | -8.050084               | -0.974777 | -2.878115 |
| 42            | 6             | 0           | -7.201629               | -1.860175 | -1.108730 |
| 43            | 1             | 0           | -8.163039               | -2.019966 | -0.630886 |
| 44            | 6             | 0           | -6.033456               | -2.238659 | -0.454559 |
| 45            | 1             | 0           | -6.090900               | -2.682415 | 0.535790  |
| 46            | 6             | 0           | -3.097520               | -4.326023 | -0.468666 |
| 47            | 6             | 0           | -4.179191               | -5.124292 | -0.854272 |
| 48            | 1             | 0           | -5.141300               | -4.674035 | -1.076425 |
| 49            | 6             | 0           | -4.026442               | -6.504027 | -0.962188 |

|     |   |   |           |           |           |
|-----|---|---|-----------|-----------|-----------|
| 50  | 1 | 0 | -4.869843 | -7.116477 | -1.264178 |
| 51  | 6 | 0 | -2.798239 | -7.096807 | -0.682684 |
| 52  | 1 | 0 | -2.684683 | -8.173258 | -0.762511 |
| 53  | 6 | 0 | -1.714072 | -6.306866 | -0.305346 |
| 54  | 1 | 0 | -0.755656 | -6.768906 | -0.086164 |
| 55  | 6 | 0 | -1.859460 | -4.928029 | -0.207669 |
| 56  | 1 | 0 | -1.008318 | -4.313323 | 0.071439  |
| 57  | 6 | 0 | 0.747775  | 2.249780  | -1.400202 |
| 58  | 1 | 0 | 1.064799  | 3.137367  | -1.958947 |
| 59  | 1 | 0 | -0.163172 | 2.516773  | -0.855383 |
| 60  | 6 | 0 | 4.449595  | 2.204393  | -1.297417 |
| 61  | 6 | 0 | 5.618077  | 2.972051  | -1.375424 |
| 62  | 1 | 0 | 5.733278  | 3.864180  | -0.764971 |
| 63  | 6 | 0 | 6.626421  | 2.616248  | -2.264567 |
| 64  | 1 | 0 | 7.530998  | 3.213087  | -2.322597 |
| 65  | 6 | 0 | 6.464797  | 1.508756  | -3.095270 |
| 66  | 1 | 0 | 7.248207  | 1.240196  | -3.797023 |
| 67  | 6 | 0 | 5.294391  | 0.757071  | -3.038528 |
| 68  | 1 | 0 | 5.164618  | -0.098299 | -3.693955 |
| 69  | 6 | 0 | 4.290566  | 1.099900  | -2.138861 |
| 70  | 1 | 0 | 3.372106  | 0.521187  | -2.091115 |
| 71  | 6 | 0 | 2.930648  | 4.419969  | -0.287353 |
| 72  | 6 | 0 | 2.801573  | 5.209598  | 0.860613  |
| 73  | 1 | 0 | 2.815393  | 4.751410  | 1.845085  |
| 74  | 6 | 0 | 2.685711  | 6.592249  | 0.744286  |
| 75  | 1 | 0 | 2.616162  | 7.203356  | 1.639144  |
| 76  | 6 | 0 | 2.673210  | 7.190274  | -0.513076 |
| 77  | 1 | 0 | 2.582760  | 8.268273  | -0.600734 |
| 78  | 6 | 0 | 2.794576  | 6.408361  | -1.660354 |
| 79  | 1 | 0 | 2.799205  | 6.875371  | -2.639771 |
| 80  | 6 | 0 | 2.936143  | 5.029986  | -1.549289 |
| 81  | 1 | 0 | 3.076852  | 4.432389  | -2.446390 |
| 82  | 6 | 0 | 3.598159  | 2.256025  | 1.545747  |
| 83  | 6 | 0 | 2.615201  | 1.882048  | 2.470024  |
| 84  | 1 | 0 | 1.580241  | 1.791189  | 2.152366  |
| 85  | 6 | 0 | 2.966977  | 1.617423  | 3.789876  |
| 86  | 1 | 0 | 2.199640  | 1.319798  | 4.496874  |
| 87  | 6 | 0 | 4.294304  | 1.734444  | 4.196483  |
| 88  | 1 | 0 | 4.567332  | 1.528386  | 5.226603  |
| 89  | 6 | 0 | 5.271069  | 2.129252  | 3.284592  |
| 90  | 1 | 0 | 6.303611  | 2.233286  | 3.602443  |
| 91  | 6 | 0 | 4.924974  | 2.391571  | 1.962737  |
| 92  | 1 | 0 | 5.694799  | 2.689315  | 1.258316  |
| 93  | 6 | 0 | 0.187337  | -1.365706 | 2.534889  |
| 94  | 6 | 0 | 0.456574  | -1.514419 | 3.887408  |
| 95  | 1 | 0 | 1.010169  | -2.378839 | 4.239192  |
| 96  | 6 | 0 | -0.002183 | -0.543056 | 4.774258  |
| 97  | 1 | 0 | 0.191090  | -0.632848 | 5.838919  |
| 98  | 6 | 0 | 3.395222  | -4.187501 | 1.317851  |
| 99  | 6 | 0 | 3.408772  | -3.909436 | 2.690021  |
| 100 | 1 | 0 | 3.079371  | -2.935775 | 3.044036  |
| 101 | 6 | 0 | 3.859338  | -4.867099 | 3.591441  |
| 102 | 1 | 0 | 3.866106  | -4.649936 | 4.654856  |
| 103 | 6 | 0 | 4.313475  | -6.100471 | 3.128483  |
| 104 | 1 | 0 | 4.667992  | -6.846323 | 3.832643  |
| 105 | 6 | 0 | 4.326419  | -6.372547 | 1.762681  |
| 106 | 1 | 0 | 4.696247  | -7.326238 | 1.400222  |
| 107 | 6 | 0 | 3.873156  | -5.418743 | 0.856369  |
| 108 | 1 | 0 | 3.902402  | -5.636963 | -0.207191 |
| 109 | 6 | 0 | 4.490168  | -1.999447 | -0.182168 |
| 110 | 6 | 0 | 4.924231  | -0.966459 | 0.654502  |
| 111 | 1 | 0 | 4.276005  | -0.592900 | 1.442425  |
| 112 | 6 | 0 | 6.194259  | -0.426545 | 0.479492  |
| 113 | 1 | 0 | 6.530758  | 0.367923  | 1.135679  |
| 114 | 6 | 0 | 7.033994  | -0.912169 | -0.518112 |
| 115 | 1 | 0 | 8.023133  | -0.485457 | -0.649237 |
| 116 | 6 | 0 | 6.609089  | -1.951171 | -1.342532 |
| 117 | 1 | 0 | 7.266293  | -2.339995 | -2.113636 |
| 118 | 6 | 0 | 5.343931  | -2.501521 | -1.171474 |
| 119 | 1 | 0 | 5.030077  | -3.324800 | -1.806685 |
| 120 | 6 | 0 | 2.298189  | -3.579077 | -1.335681 |
| 121 | 6 | 0 | 1.547373  | -4.760122 | -1.302661 |
| 122 | 1 | 0 | 1.426708  | -5.304520 | -0.369947 |
| 123 | 6 | 0 | 0.957980  | -5.250452 | -2.464561 |
| 124 | 1 | 0 | 0.377802  | -6.166577 | -2.430415 |
| 125 | 6 | 0 | 1.113282  | -4.566284 | -3.667288 |
| 126 | 1 | 0 | 0.667579  | -4.959947 | -4.575356 |

|     |   |   |           |           |           |
|-----|---|---|-----------|-----------|-----------|
| 127 | 6 | 0 | 1.841266  | -3.378630 | -3.703648 |
| 128 | 1 | 0 | 1.958213  | -2.838685 | -4.637515 |
| 129 | 6 | 0 | 2.417986  | -2.877928 | -2.542057 |
| 130 | 1 | 0 | 2.968569  | -1.941584 | -2.577290 |
| 131 | 6 | 0 | -1.832815 | 1.719283  | 2.354873  |
| 132 | 1 | 0 | -2.822070 | 1.568624  | 2.819609  |
| 133 | 1 | 0 | -1.449829 | 2.669191  | 2.764817  |
| 134 | 6 | 0 | -2.558623 | 4.494709  | 0.725528  |
| 135 | 6 | 0 | -3.543925 | 5.487384  | 0.757810  |
| 136 | 1 | 0 | -4.580011 | 5.238008  | 0.547110  |
| 137 | 6 | 0 | -3.199504 | 6.801312  | 1.059843  |
| 138 | 1 | 0 | -3.966289 | 7.568631  | 1.084328  |
| 139 | 6 | 0 | -1.872671 | 7.127761  | 1.331168  |
| 140 | 1 | 0 | -1.607051 | 8.153326  | 1.568058  |
| 141 | 6 | 0 | -0.888167 | 6.143008  | 1.297468  |
| 142 | 1 | 0 | 0.145866  | 6.397255  | 1.501317  |
| 143 | 6 | 0 | -1.225527 | 4.828817  | 0.992816  |
| 144 | 1 | 0 | -0.456852 | 4.059252  | 0.957692  |
| 145 | 6 | 0 | -4.659565 | 2.497466  | 0.723503  |
| 146 | 6 | 0 | -5.061921 | 2.835845  | 2.024467  |
| 147 | 1 | 0 | -4.394466 | 3.394715  | 2.675301  |
| 148 | 6 | 0 | -6.329381 | 2.490468  | 2.482711  |
| 149 | 1 | 0 | -6.633465 | 2.765526  | 3.487903  |
| 150 | 6 | 0 | -7.208160 | 1.802565  | 1.648573  |
| 151 | 1 | 0 | -8.197873 | 1.536137  | 2.005906  |
| 152 | 6 | 0 | -6.823435 | 1.477493  | 0.350513  |
| 153 | 1 | 0 | -7.508053 | 0.955529  | -0.309395 |
| 154 | 6 | 0 | -5.556186 | 1.820951  | -0.112473 |
| 155 | 1 | 0 | -5.279667 | 1.561199  | -1.128889 |
| 156 | 6 | 0 | -2.803336 | 2.710366  | -1.548730 |
| 157 | 6 | 0 | -2.996317 | 1.495487  | -2.214289 |
| 158 | 1 | 0 | -3.169892 | 0.586263  | -1.647510 |
| 159 | 6 | 0 | -2.940368 | 1.443689  | -3.601468 |
| 160 | 1 | 0 | -3.094308 | 0.499039  | -4.113662 |
| 161 | 6 | 0 | -2.668225 | 2.595729  | -4.335341 |
| 162 | 1 | 0 | -2.618202 | 2.550338  | -5.418912 |
| 163 | 6 | 0 | -2.461494 | 3.804761  | -3.678324 |
| 164 | 1 | 0 | -2.251489 | 4.706236  | -4.244874 |
| 165 | 6 | 0 | -2.537491 | 3.867134  | -2.289421 |
| 166 | 1 | 0 | -2.385510 | 4.817723  | -1.789053 |
| 167 | 6 | 0 | 0.698233  | -2.342140 | 1.505303  |
| 168 | 1 | 0 | 0.878664  | -3.309336 | 1.993546  |
| 169 | 1 | 0 | -0.090050 | -2.478031 | 0.751884  |
| 170 | 6 | 0 | -0.718837 | 0.533050  | 4.276650  |
| 171 | 1 | 0 | -1.105138 | 1.303800  | 4.937041  |
| 172 | 6 | 0 | -0.968346 | 0.604916  | 2.903860  |

-----  
PCM: SCF Done: E(RwB97XD) = -8295.64351887 A.U. after 23 cycles  
Convg = 0.3570D-08 -V/T = 2.0035

LCu\_OMePhCN (VI)

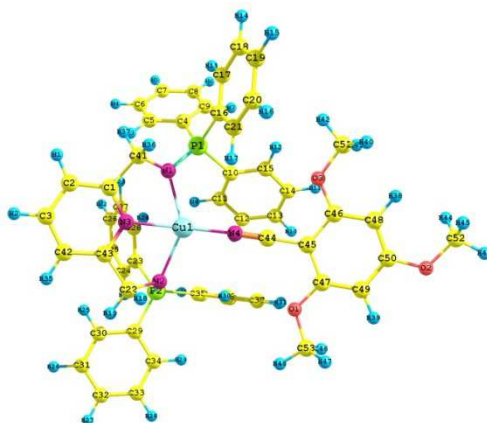

| Center Number | Atomic Number | Atomic Type | Coordinates (Angstroms) |           |           |
|---------------|---------------|-------------|-------------------------|-----------|-----------|
|               |               |             | X                       | Y         | Z         |
| 1             | 29            | 0           | 0.415646                | 0.169565  | -1.294495 |
| 2             | 15            | 0           | -0.957242               | 2.849924  | 0.191024  |
| 3             | 15            | 0           | 3.062927                | -1.470751 | 0.095801  |
| 4             | 7             | 0           | 0.210659                | 2.354698  | -0.765800 |
| 5             | 7             | 0           | 2.179666                | -1.220186 | -1.200027 |
| 6             | 7             | 0           | 1.815725                | 1.134843  | -2.492560 |
| 7             | 6             | 0           | 1.797213                | 2.462231  | -2.570761 |
| 8             | 6             | 0           | 2.870752                | 3.162841  | -3.112466 |
| 9             | 1             | 0           | 2.845855                | 4.246194  | -3.173585 |
| 10            | 6             | 0           | 3.981086                | 2.442999  | -3.544504 |
| 11            | 1             | 0           | 4.837607                | 2.961739  | -3.964035 |
| 12            | 6             | 0           | -0.511273               | 4.232536  | 1.288476  |
| 13            | 6             | 0           | 0.700303                | 4.896693  | 1.085466  |
| 14            | 1             | 0           | 1.353524                | 4.589745  | 0.274298  |
| 15            | 6             | 0           | 1.082992                | 5.931762  | 1.934457  |
| 16            | 1             | 0           | 2.026233                | 6.444188  | 1.772328  |
| 17            | 6             | 0           | 0.259414                | 6.302385  | 2.993616  |
| 18            | 1             | 0           | 0.558884                | 7.106515  | 3.658551  |
| 19            | 6             | 0           | -0.945147               | 5.634451  | 3.210170  |
| 20            | 1             | 0           | -1.581022               | 5.914885  | 4.043984  |
| 21            | 6             | 0           | -1.328769               | 4.599987  | 2.363659  |
| 22            | 1             | 0           | -2.259677               | 4.068676  | 2.547463  |
| 23            | 6             | 0           | -1.382456               | 1.482856  | 1.290703  |
| 24            | 6             | 0           | -0.343182               | 0.841308  | 1.975929  |
| 25            | 1             | 0           | 0.679374                | 1.193118  | 1.874086  |
| 26            | 6             | 0           | -0.618512               | -0.257487 | 2.777713  |
| 27            | 1             | 0           | 0.190408                | -0.760779 | 3.296554  |
| 28            | 6             | 0           | -1.927362               | -0.722138 | 2.901562  |
| 29            | 1             | 0           | -2.133936               | -1.592482 | 3.516946  |
| 30            | 6             | 0           | -2.963472               | -0.075170 | 2.237273  |
| 31            | 1             | 0           | -3.983094               | -0.437074 | 2.332487  |
| 32            | 6             | 0           | -2.693529               | 1.031724  | 1.435314  |
| 33            | 1             | 0           | -3.501737               | 1.522214  | 0.904101  |
| 34            | 6             | 0           | -2.463465               | 3.338770  | -0.703867 |
| 35            | 6             | 0           | -3.115166               | 4.561421  | -0.523559 |
| 36            | 1             | 0           | -2.754534               | 5.271845  | 0.213911  |
| 37            | 6             | 0           | -4.229148               | 4.878726  | -1.297716 |
| 38            | 1             | 0           | -4.730300               | 5.830866  | -1.155019 |
| 39            | 6             | 0           | -4.689985               | 3.983068  | -2.258791 |
| 40            | 1             | 0           | -5.553553               | 4.237514  | -2.866064 |
| 41            | 6             | 0           | -4.036539               | 2.765895  | -2.450711 |
| 42            | 1             | 0           | -4.387990               | 2.067615  | -3.204158 |
| 43            | 6             | 0           | -2.926034               | 2.443137  | -1.678963 |
| 44            | 1             | 0           | -2.417939               | 1.494016  | -1.828023 |
| 45            | 6             | 0           | 2.778998                | -1.042896 | -2.517905 |
| 46            | 1             | 0           | 2.113748                | -1.511450 | -3.255870 |
| 47            | 1             | 0           | 3.760473                | -1.524929 | -2.629945 |
| 48            | 6             | 0           | 3.770176                | -0.006987 | 0.930685  |
| 49            | 6             | 0           | 4.877242                | -0.100632 | 1.783962  |
| 50            | 1             | 0           | 5.388573                | -1.050780 | 1.914299  |
| 51            | 6             | 0           | 5.340224                | 1.024050  | 2.459917  |

|     |   |   |           |           |           |
|-----|---|---|-----------|-----------|-----------|
| 52  | 1 | 0 | 6.199585  | 0.942100  | 3.118170  |
| 53  | 6 | 0 | 4.703129  | 2.251287  | 2.290221  |
| 54  | 1 | 0 | 5.064258  | 3.127532  | 2.819933  |
| 55  | 6 | 0 | 3.608242  | 2.352381  | 1.436469  |
| 56  | 1 | 0 | 3.105288  | 3.304950  | 1.302687  |
| 57  | 6 | 0 | 3.143623  | 1.231153  | 0.754674  |
| 58  | 1 | 0 | 2.288330  | 1.333629  | 0.091877  |
| 59  | 6 | 0 | 4.484564  | -2.562881 | -0.202402 |
| 60  | 6 | 0 | 5.662407  | -2.038901 | -0.751045 |
| 61  | 1 | 0 | 5.767112  | -0.966157 | -0.894516 |
| 62  | 6 | 0 | 6.708670  | -2.885796 | -1.101844 |
| 63  | 1 | 0 | 7.619355  | -2.473153 | -1.524462 |
| 64  | 6 | 0 | 6.587262  | -4.259780 | -0.906467 |
| 65  | 1 | 0 | 7.405472  | -4.920127 | -1.176703 |
| 66  | 6 | 0 | 5.418180  | -4.787538 | -0.364132 |
| 67  | 1 | 0 | 5.324063  | -5.857666 | -0.209212 |
| 68  | 6 | 0 | 4.366842  | -3.944210 | -0.017632 |
| 69  | 1 | 0 | 3.456542  | -4.360536 | 0.404645  |
| 70  | 6 | 0 | 2.005780  | -2.287535 | 1.321503  |
| 71  | 6 | 0 | 0.794862  | -2.848582 | 0.909259  |
| 72  | 1 | 0 | 0.478764  | -2.737700 | -0.122817 |
| 73  | 6 | 0 | 0.000116  | -3.528148 | 1.828791  |
| 74  | 1 | 0 | -0.950956 | -3.937845 | 1.506557  |
| 75  | 6 | 0 | 0.416957  | -3.669006 | 3.149215  |
| 76  | 1 | 0 | -0.200611 | -4.209730 | 3.860478  |
| 77  | 6 | 0 | 1.626821  | -3.112464 | 3.562371  |
| 78  | 1 | 0 | 1.953751  | -3.217845 | 4.592093  |
| 79  | 6 | 0 | 2.415883  | -2.414934 | 2.653322  |
| 80  | 1 | 0 | 3.349151  | -1.971196 | 2.986915  |
| 81  | 6 | 0 | 0.564528  | 3.103254  | -1.968114 |
| 82  | 6 | 0 | 4.005550  | 1.057662  | -3.397165 |
| 83  | 1 | 0 | 4.876699  | 0.476795  | -3.683541 |
| 84  | 6 | 0 | 2.891629  | 0.432405  | -2.848625 |
| 85  | 1 | 0 | -0.245657 | 3.072072  | -2.717429 |
| 86  | 1 | 0 | 0.774154  | 4.168000  | -1.789560 |
| 87  | 6 | 0 | -2.176281 | -1.450541 | -0.989826 |
| 88  | 7 | 0 | -1.235446 | -0.819863 | -1.212620 |
| 89  | 6 | 0 | -3.310420 | -2.249301 | -0.706855 |
| 90  | 6 | 0 | -4.576561 | -1.661756 | -0.535570 |
| 91  | 6 | 0 | -3.166879 | -3.650508 | -0.586966 |
| 92  | 6 | 0 | -5.682410 | -2.447441 | -0.215094 |
| 93  | 6 | 0 | -4.261076 | -4.438724 | -0.275575 |
| 94  | 6 | 0 | -5.510094 | -3.830346 | -0.086549 |
| 95  | 1 | 0 | -6.655564 | -1.997784 | -0.082919 |
| 96  | 1 | 0 | -4.196373 | -5.513636 | -0.172883 |
| 97  | 8 | 0 | -1.922318 | -4.114678 | -0.790390 |
| 98  | 8 | 0 | -6.504485 | -4.676423 | 0.218778  |
| 99  | 8 | 0 | -4.622052 | -0.330123 | -0.707252 |
| 100 | 6 | 0 | -5.847957 | 0.348973  | -0.499604 |
| 101 | 1 | 0 | -6.611091 | 0.011315  | -1.209748 |
| 102 | 1 | 0 | -6.207186 | 0.209387  | 0.526777  |
| 103 | 1 | 0 | -5.631832 | 1.402951  | -0.674964 |
| 104 | 6 | 0 | -7.810414 | -4.165976 | 0.420662  |
| 105 | 1 | 0 | -8.429971 | -5.028857 | 0.662372  |
| 106 | 1 | 0 | -7.833536 | -3.455944 | 1.255470  |
| 107 | 1 | 0 | -8.192633 | -3.686119 | -0.487616 |
| 108 | 6 | 0 | -1.701809 | -5.515354 | -0.755447 |
| 109 | 1 | 0 | -1.942529 | -5.929607 | 0.230250  |
| 110 | 1 | 0 | -2.291559 | -6.022819 | -1.526188 |
| 111 | 1 | 0 | -0.639357 | -5.648814 | -0.955424 |

-----  
PCM : SCF Done: E(RwB97XD) = -4815.67291924      A.U. after 21 cycles  
Convg = 0.6147D-08                                      -V/T = 2.0038

OMePhCN

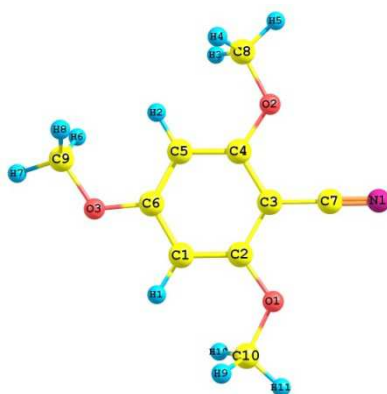

| Center Number | Atomic Number | Atomic Type | Coordinates (Angstroms) |           |           |
|---------------|---------------|-------------|-------------------------|-----------|-----------|
|               |               |             | X                       | Y         | Z         |
| 1             | 6             | 0           | -0.246292               | 0.249388  | 0.014877  |
| 2             | 6             | 0           | -0.145806               | -0.048093 | 1.367430  |
| 3             | 6             | 0           | 1.117728                | -0.110607 | 1.991874  |
| 4             | 6             | 0           | 2.273171                | 0.130898  | 1.232078  |
| 5             | 6             | 0           | 2.182859                | 0.431053  | -0.129641 |
| 6             | 6             | 0           | 0.919348                | 0.486104  | -0.720611 |
| 7             | 1             | 0           | -1.195480               | 0.306916  | -0.500663 |
| 8             | 1             | 0           | 3.075108                | 0.615991  | -0.709674 |
| 9             | 6             | 0           | 1.221055                | -0.416095 | 3.381823  |
| 10            | 7             | 0           | 1.306383                | -0.663417 | 4.507198  |
| 11            | 8             | 0           | -1.195531               | -0.292300 | 2.169151  |
| 12            | 8             | 0           | 3.434151                | 0.051287  | 1.904894  |
| 13            | 8             | 0           | 0.717911                | 0.766965  | -2.025568 |
| 14            | 6             | 0           | 4.643599                | 0.281694  | 1.214191  |
| 15            | 1             | 0           | 4.788805                | -0.449651 | 0.409631  |
| 16            | 1             | 0           | 4.679853                | 1.297453  | 0.801692  |
| 17            | 1             | 0           | 5.433258                | 0.164426  | 1.955917  |
| 18            | 6             | 0           | 1.838570                | 1.019770  | -2.845875 |
| 19            | 1             | 0           | 2.506444                | 0.150579  | -2.890477 |
| 20            | 1             | 0           | 1.440442                | 1.218798  | -3.841225 |
| 21            | 1             | 0           | 2.399550                | 1.896286  | -2.498600 |
| 22            | 6             | 0           | -2.494273               | -0.247446 | 1.614705  |
| 23            | 1             | 0           | -2.720877               | 0.748308  | 1.215432  |
| 24            | 1             | 0           | -2.613744               | -0.997014 | 0.823392  |
| 25            | 1             | 0           | -3.173661               | -0.473659 | 2.436077  |

PCM : SCF Done: E(RwB97XD) = -667.867088698 A.U. after 14 cycles  
 Convg = 0.4097D-08 -V/T = 2.0059

LCu\_MeCN (VII)

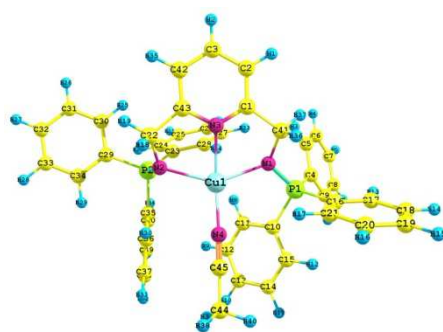

| Center Number | Atomic Number | Atomic Type | Coordinates (Angstroms) |           |           |
|---------------|---------------|-------------|-------------------------|-----------|-----------|
|               |               |             | X                       | Y         | Z         |
| 1             | 29            | 0           | 0.027484                | 0.234263  | -1.534795 |
| 2             | 15            | 0           | 2.918932                | -0.257842 | 0.159660  |
| 3             | 15            | 0           | -2.984356               | 0.099400  | 0.009621  |
| 4             | 7             | 0           | 1.721090                | -0.942424 | -0.629539 |
| 5             | 7             | 0           | -2.191067               | 0.055961  | -1.366485 |
| 6             | 7             | 0           | -0.309626               | -1.718825 | -2.158627 |
| 7             | 6             | 0           | 0.631734                | -2.636274 | -1.955638 |
| 8             | 6             | 0           | 0.351086                | -3.992795 | -2.088388 |
| 9             | 1             | 0           | 1.126202                | -4.733997 | -1.921925 |
| 10            | 6             | 0           | -0.949117               | -4.372012 | -2.409824 |
| 11            | 1             | 0           | -1.199356               | -5.423273 | -2.514093 |
| 12            | 6             | 0           | 3.484428                | -1.152150 | 1.640308  |
| 13            | 6             | 0           | 3.076464                | -2.473516 | 1.837160  |
| 14            | 1             | 0           | 2.430925                | -2.954187 | 1.108408  |
| 15            | 6             | 0           | 3.474289                | -3.167267 | 2.976711  |
| 16            | 1             | 0           | 3.155603                | -4.194523 | 3.124144  |
| 17            | 6             | 0           | 4.276172                | -2.541639 | 3.927311  |
| 18            | 1             | 0           | 4.584036                | -3.081026 | 4.817594  |
| 19            | 6             | 0           | 4.676741                | -1.219252 | 3.743135  |
| 20            | 1             | 0           | 5.291247                | -0.726968 | 4.490158  |
| 21            | 6             | 0           | 4.280754                | -0.524385 | 2.605400  |
| 22            | 1             | 0           | 4.579765                | 0.513001  | 2.475745  |
| 23            | 6             | 0           | 2.341360                | 1.344288  | 0.771194  |
| 24            | 6             | 0           | 1.098811                | 1.405279  | 1.412231  |
| 25            | 1             | 0           | 0.511074                | 0.503203  | 1.555025  |
| 26            | 6             | 0           | 0.608645                | 2.623884  | 1.863769  |
| 27            | 1             | 0           | -0.359712               | 2.667232  | 2.349669  |
| 28            | 6             | 0           | 1.359851                | 3.785790  | 1.693700  |
| 29            | 1             | 0           | 0.974455                | 4.734617  | 2.055765  |
| 30            | 6             | 0           | 2.606430                | 3.725828  | 1.076744  |
| 31            | 1             | 0           | 3.201885                | 4.626653  | 0.959705  |
| 32            | 6             | 0           | 3.097944                | 2.506904  | 0.611535  |
| 33            | 1             | 0           | 4.066106                | 2.468112  | 0.120875  |
| 34            | 6             | 0           | 4.379699                | 0.049178  | -0.874018 |
| 35            | 6             | 0           | 5.684519                | -0.287373 | -0.506242 |
| 36            | 1             | 0           | 5.881015                | -0.745141 | 0.458425  |
| 37            | 6             | 0           | 6.738856                | -0.042521 | -1.383580 |
| 38            | 1             | 0           | 7.751726                | -0.305340 | -1.095334 |
| 39            | 6             | 0           | 6.494766                | 0.531821  | -2.627466 |
| 40            | 1             | 0           | 7.318448                | 0.718047  | -3.309646 |
| 41            | 6             | 0           | 5.192462                | 0.858962  | -3.004451 |
| 42            | 1             | 0           | 5.001579                | 1.296007  | -3.979558 |
| 43            | 6             | 0           | 4.137303                | 0.615887  | -2.134185 |
| 44            | 1             | 0           | 3.117207                | 0.854704  | -2.428365 |
| 45            | 6             | 0           | -2.527067               | -0.886342 | -2.427825 |
| 46            | 1             | 0           | -2.413885               | -0.368609 | -3.390119 |
| 47            | 1             | 0           | -3.563742               | -1.248583 | -2.388571 |
| 48            | 6             | 0           | -2.456147               | -1.053216 | 1.323149  |
| 49            | 6             | 0           | -3.293444               | -1.382724 | 2.397346  |
| 50            | 1             | 0           | -4.310365               | -1.000840 | 2.436461  |
| 51            | 6             | 0           | -2.835569               | -2.214389 | 3.414443  |
| 52            | 1             | 0           | -3.492505               | -2.467221 | 4.240793  |
| 53            | 6             | 0           | -1.539944               | -2.724776 | 3.367503  |
| 54            | 1             | 0           | -1.183874               | -3.373246 | 4.162134  |
| 55            | 6             | 0           | -0.706872               | -2.408271 | 2.298323  |

|    |   |   |           |           |           |
|----|---|---|-----------|-----------|-----------|
| 56 | 1 | 0 | 0.304073  | -2.801144 | 2.258381  |
| 57 | 6 | 0 | -1.161450 | -1.580198 | 1.275643  |
| 58 | 1 | 0 | -0.495648 | -1.349028 | 0.448212  |
| 59 | 6 | 0 | -4.767171 | -0.191196 | -0.172532 |
| 60 | 6 | 0 | -5.250585 | -1.503947 | -0.255788 |
| 61 | 1 | 0 | -4.576042 | -2.343661 | -0.106146 |
| 62 | 6 | 0 | -6.596634 | -1.738368 | -0.514729 |
| 63 | 1 | 0 | -6.966490 | -2.757025 | -0.576201 |
| 64 | 6 | 0 | -7.468992 | -0.666198 | -0.689624 |
| 65 | 1 | 0 | -8.520818 | -0.849894 | -0.885080 |
| 66 | 6 | 0 | -6.994546 | 0.640720  | -0.610687 |
| 67 | 1 | 0 | -7.675405 | 1.475418  | -0.743749 |
| 68 | 6 | 0 | -5.647074 | 0.880030  | -0.358849 |
| 69 | 1 | 0 | -5.282451 | 1.901664  | -0.299153 |
| 70 | 6 | 0 | -2.773828 | 1.771858  | 0.681600  |
| 71 | 6 | 0 | -2.415982 | 2.798746  | -0.196334 |
| 72 | 1 | 0 | -2.218342 | 2.554174  | -1.235101 |
| 73 | 6 | 0 | -2.319492 | 4.107448  | 0.268630  |
| 74 | 1 | 0 | -2.053262 | 4.905331  | -0.418813 |
| 75 | 6 | 0 | -2.588776 | 4.398524  | 1.603966  |
| 76 | 1 | 0 | -2.524306 | 5.421500  | 1.962569  |
| 77 | 6 | 0 | -2.949006 | 3.376660  | 2.481030  |
| 78 | 1 | 0 | -3.159517 | 3.599449  | 3.522227  |
| 79 | 6 | 0 | -3.036882 | 2.064679  | 2.023348  |
| 80 | 1 | 0 | -3.307916 | 1.274504  | 2.717009  |
| 81 | 6 | 0 | 1.968642  | -2.076167 | -1.517146 |
| 82 | 6 | 0 | -1.935356 | -3.398749 | -2.554581 |
| 83 | 1 | 0 | -2.967079 | -3.667959 | -2.757309 |
| 84 | 6 | 0 | -1.573580 | -2.064654 | -2.406942 |
| 85 | 1 | 0 | 2.529676  | -1.769292 | -2.416751 |
| 86 | 1 | 0 | 2.551827  | -2.887598 | -1.058621 |
| 87 | 6 | 0 | 1.089010  | 4.615039  | -1.923460 |
| 88 | 1 | 0 | 0.712440  | 5.080310  | -2.837965 |
| 89 | 1 | 0 | 0.617964  | 5.078659  | -1.053049 |
| 90 | 1 | 0 | 2.169862  | 4.761527  | -1.858411 |
| 91 | 6 | 0 | 0.785962  | 3.190320  | -1.927431 |
| 92 | 7 | 0 | 0.534957  | 2.067665  | -1.923385 |

-----  
PCM : SCF Done: E(RwB97XD) = -4280.52176634 A.U. after 20 cycles  
Convrg = 0.7201D-08 -V/T = 2.0035



MeCN

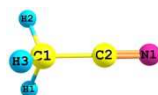

| Center Number | Atomic Number | Atomic Type | Coordinates (Angstroms) |           |           |
|---------------|---------------|-------------|-------------------------|-----------|-----------|
|               |               |             | X                       | Y         | Z         |
| 1             | 6             | 0           | 0.000000                | 0.000000  | -1.179233 |
| 2             | 1             | 0           | 0.000000                | 1.027294  | -1.552294 |
| 3             | 1             | 0           | -0.889662               | -0.513647 | -1.552294 |
| 4             | 1             | 0           | 0.889662                | -0.513647 | -1.552294 |
| 5             | 6             | 0           | 0.000000                | 0.000000  | 0.282002  |
| 6             | 7             | 0           | 0.000000                | 0.000000  | 1.434324  |

PCM : SCF Done: E(RwB97XD) = -132.729391706 A.U. after 11 cycles  
 Convg = 0.1848D-08 -V/T = 2.0053

LCu (VIII)

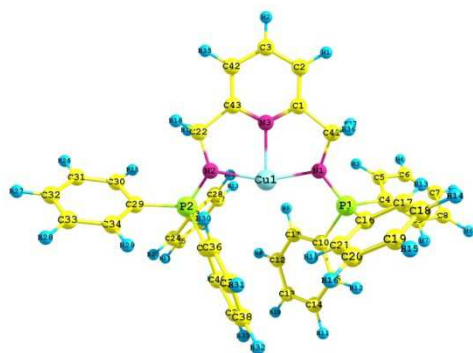

| Center Number | Atomic Number | Atomic Type | Coordinates (Angstroms) |           |           |
|---------------|---------------|-------------|-------------------------|-----------|-----------|
|               |               |             | X                       | Y         | Z         |
| 1             | 29            | 0           | 0.034092                | 0.848666  | -0.269886 |
| 2             | 15            | 0           | -2.855753               | -0.073751 | 0.046555  |
| 3             | 15            | 0           | 2.871306                | -0.102222 | -0.085764 |
| 4             | 7             | 0           | -1.884294               | 1.189551  | 0.193495  |
| 5             | 7             | 0           | 1.998627                | 1.168571  | -0.493012 |
| 6             | 7             | 0           | 0.052171                | 2.889531  | -0.284666 |
| 7             | 6             | 0           | -1.120778               | 3.495046  | -0.227627 |
| 8             | 6             | 0           | -1.170447               | 4.885549  | -0.228798 |
| 9             | 1             | 0           | -2.113863               | 5.420028  | -0.180190 |
| 10            | 6             | 0           | 0.043177                | 5.575399  | -0.294506 |
| 11            | 1             | 0           | 0.039476                | 6.661232  | -0.300351 |
| 12            | 6             | 0           | -4.442476               | 0.124968  | 0.901112  |
| 13            | 6             | 0           | -4.483164               | 0.987388  | 2.002422  |
| 14            | 1             | 0           | -3.592799               | 1.543097  | 2.284942  |
| 15            | 6             | 0           | -5.654956               | 1.120380  | 2.740210  |
| 16            | 1             | 0           | -5.684793               | 1.795467  | 3.589542  |
| 17            | 6             | 0           | -6.785425               | 0.386236  | 2.389868  |
| 18            | 1             | 0           | -7.700274               | 0.491941  | 2.964424  |
| 19            | 6             | 0           | -6.744575               | -0.487501 | 1.305396  |
| 20            | 1             | 0           | -7.623918               | -1.064424 | 1.037265  |
| 21            | 6             | 0           | -5.576427               | -0.621860 | 0.562691  |
| 22            | 1             | 0           | -5.552512               | -1.304901 | -0.281791 |
| 23            | 6             | 0           | -2.028798               | -1.481704 | 0.830983  |
| 24            | 6             | 0           | -1.063644               | -1.250112 | 1.816457  |
| 25            | 1             | 0           | -0.789503               | -0.230496 | 2.069006  |
| 26            | 6             | 0           | -0.461243               | -2.320757 | 2.469168  |
| 27            | 1             | 0           | 0.296781                | -2.130478 | 3.223426  |
| 28            | 6             | 0           | -0.833072               | -3.625846 | 2.154571  |
| 29            | 1             | 0           | -0.369073               | -4.462090 | 2.668964  |
| 30            | 6             | 0           | -1.805674               | -3.860271 | 1.185135  |
| 31            | 1             | 0           | -2.100754               | -4.876590 | 0.943752  |
| 32            | 6             | 0           | -2.405186               | -2.792317 | 0.524209  |
| 33            | 1             | 0           | -3.159363               | -2.985639 | -0.233738 |
| 34            | 6             | 0           | -3.210448               | -0.508379 | -1.677488 |
| 35            | 6             | 0           | -4.290349               | 0.073067  | -2.352134 |
| 36            | 1             | 0           | -5.015298               | 0.674839  | -1.811090 |
| 37            | 6             | 0           | -4.447238               | -0.125118 | -3.721197 |
| 38            | 1             | 0           | -5.290385               | 0.323021  | -4.236953 |
| 39            | 6             | 0           | -3.525851               | -0.896975 | -4.423449 |
| 40            | 1             | 0           | -3.653575               | -1.055233 | -5.489697 |
| 41            | 6             | 0           | -2.438786               | -1.463154 | -3.759877 |
| 42            | 1             | 0           | -1.716849               | -2.061200 | -4.307161 |
| 43            | 6             | 0           | -2.273213               | -1.263670 | -2.394627 |
| 44            | 1             | 0           | -1.413709               | -1.696923 | -1.888952 |
| 45            | 6             | 0           | 2.425150                | 2.556603  | -0.318267 |
| 46            | 1             | 0           | 3.126620                | 2.851840  | -1.110369 |
| 47            | 1             | 0           | 2.946255                | 2.725594  | 0.638626  |
| 48            | 6             | 0           | 2.894984                | -0.440772 | 1.702583  |
| 49            | 6             | 0           | 3.718211                | -1.431206 | 2.250984  |
| 50            | 1             | 0           | 4.383449                | -2.005272 | 1.610483  |
| 51            | 6             | 0           | 3.691190                | -1.678879 | 3.619282  |
| 52            | 1             | 0           | 4.326193                | -2.451305 | 4.041229  |
| 53            | 6             | 0           | 2.862288                | -0.923294 | 4.448707  |
| 54            | 1             | 0           | 2.852046                | -1.110257 | 5.518084  |

|    |   |   |           |           |           |
|----|---|---|-----------|-----------|-----------|
| 55 | 6 | 0 | 2.058391  | 0.078485  | 3.910466  |
| 56 | 1 | 0 | 1.424118  | 0.676393  | 4.557396  |
| 57 | 6 | 0 | 2.070454  | 0.316560  | 2.538199  |
| 58 | 1 | 0 | 1.438544  | 1.092298  | 2.112184  |
| 59 | 6 | 0 | 4.622686  | -0.011448 | -0.549208 |
| 60 | 6 | 0 | 5.473433  | 0.784210  | 0.230564  |
| 61 | 1 | 0 | 5.100687  | 1.262403  | 1.133177  |
| 62 | 6 | 0 | 6.803577  | 0.952215  | -0.134553 |
| 63 | 1 | 0 | 7.457161  | 1.568321  | 0.474567  |
| 64 | 6 | 0 | 7.296213  | 0.322957  | -1.276198 |
| 65 | 1 | 0 | 8.336878  | 0.450204  | -1.557295 |
| 66 | 6 | 0 | 6.458616  | -0.474140 | -2.051423 |
| 67 | 1 | 0 | 6.844891  | -0.970486 | -2.935835 |
| 68 | 6 | 0 | 5.123536  | -0.641155 | -1.693324 |
| 69 | 1 | 0 | 4.480458  | -1.271235 | -2.300133 |
| 70 | 6 | 0 | 2.090984  | -1.497775 | -0.932978 |
| 71 | 6 | 0 | 1.775907  | -1.336025 | -2.290102 |
| 72 | 1 | 0 | 2.000493  | -0.397019 | -2.787265 |
| 73 | 6 | 0 | 1.153838  | -2.365255 | -2.985990 |
| 74 | 1 | 0 | 0.927183  | -2.239707 | -4.040210 |
| 75 | 6 | 0 | 0.817283  | -3.548683 | -2.328739 |
| 76 | 1 | 0 | 0.323918  | -4.349939 | -2.870634 |
| 77 | 6 | 0 | 1.109207  | -3.702420 | -0.976795 |
| 78 | 1 | 0 | 0.832519  | -4.614471 | -0.458586 |
| 79 | 6 | 0 | 1.754454  | -2.684080 | -0.279044 |
| 80 | 1 | 0 | 1.966578  | -2.811042 | 0.776867  |
| 81 | 6 | 0 | -2.310852 | 2.534950  | -0.207910 |
| 82 | 6 | 0 | 1.260474  | 4.893635  | -0.346322 |
| 83 | 1 | 0 | 2.200927  | 5.433819  | -0.391023 |
| 84 | 6 | 0 | 1.220703  | 3.501256  | -0.333387 |
| 85 | 1 | 0 | -2.748798 | 2.543645  | -1.220746 |
| 86 | 1 | 0 | -3.080128 | 2.932643  | 0.467800  |

-----  
PCM : SCF Done: E(RwB97XD) = -4147.77298114 A.U. after 18 cycles  
Convrg = 0.6891D-08 -V/T = 2.0035

### LCuPet3 (IX)

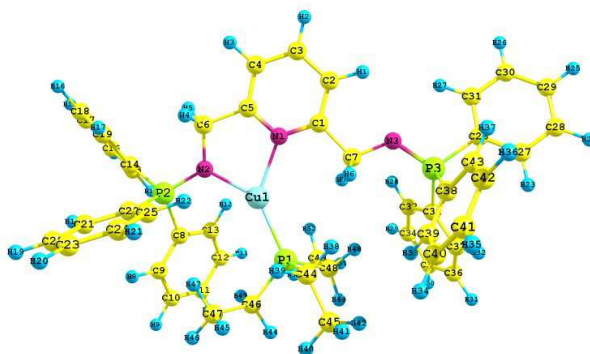

| Center Number | Atomic Number | Atomic Type | Coordinates (Angstroms) |           |           |
|---------------|---------------|-------------|-------------------------|-----------|-----------|
|               |               |             | X                       | Y         | Z         |
| 1             | 29            | 0           | -1.073129               | 0.065067  | 0.132625  |
| 2             | 15            | 0           | -0.320263               | -2.017385 | 0.127850  |
| 3             | 15            | 0           | -4.216430               | 0.494931  | -0.075196 |
| 4             | 15            | 0           | 4.581113                | 0.542216  | -0.063167 |
| 5             | 7             | 0           | -0.227043               | 1.948039  | 0.331026  |
| 6             | 7             | 0           | -2.766548               | 1.150462  | 0.050305  |
| 7             | 7             | 0           | 3.381490                | 1.556882  | -0.138771 |
| 8             | 6             | 0           | 1.079425                | 2.259313  | 0.273962  |
| 9             | 6             | 0           | 1.519161                | 3.568551  | 0.406538  |
| 10            | 1             | 0           | 2.583765                | 3.759499  | 0.349849  |
| 11            | 6             | 0           | 0.577459                | 4.574442  | 0.597571  |
| 12            | 1             | 0           | 0.892411                | 5.608389  | 0.701369  |
| 13            | 6             | 0           | -0.770816               | 4.246774  | 0.644658  |
| 14            | 1             | 0           | -1.532291               | 5.008477  | 0.779771  |
| 15            | 6             | 0           | -1.137743               | 2.911449  | 0.505423  |
| 16            | 6             | 0           | -2.593050               | 2.491879  | 0.575323  |
| 17            | 1             | 0           | -2.903622               | 2.572036  | 1.632059  |
| 18            | 1             | 0           | -3.190291               | 3.229627  | 0.020071  |
| 19            | 6             | 0           | 2.035483                | 1.107150  | 0.056466  |
| 20            | 1             | 0           | 1.913446                | 0.433807  | 0.929106  |
| 21            | 1             | 0           | 1.642689                | 0.539947  | -0.808678 |
| 22            | 6             | 0           | -4.095668               | -0.840710 | -1.289081 |
| 23            | 6             | 0           | -4.863816               | -2.003216 | -1.190276 |
| 24            | 1             | 0           | -5.521594               | -2.157485 | -0.340414 |
| 25            | 6             | 0           | -4.772294               | -2.982981 | -2.175623 |
| 26            | 1             | 0           | -5.364542               | -3.888460 | -2.091000 |
| 27            | 6             | 0           | -3.922018               | -2.802842 | -3.264095 |
| 28            | 1             | 0           | -3.856665               | -3.566815 | -4.032466 |
| 29            | 6             | 0           | -3.155974               | -1.642367 | -3.367191 |
| 30            | 1             | 0           | -2.492811               | -1.498900 | -4.214489 |
| 31            | 6             | 0           | -3.238253               | -0.663886 | -2.382316 |
| 32            | 1             | 0           | -2.637165               | 0.237816  | -2.452118 |
| 33            | 6             | 0           | -5.490582               | 1.653430  | -0.644153 |
| 34            | 6             | 0           | -5.867941               | 1.707198  | -1.990005 |
| 35            | 1             | 0           | -5.458865               | 0.997622  | -2.703089 |
| 36            | 6             | 0           | -6.782783               | 2.664509  | -2.418823 |
| 37            | 1             | 0           | -7.078124               | 2.697814  | -3.462577 |
| 38            | 6             | 0           | -7.318466               | 3.574101  | -1.511065 |
| 39            | 1             | 0           | -8.032841               | 4.318607  | -1.848054 |
| 40            | 6             | 0           | -6.944595               | 3.527484  | -0.169316 |
| 41            | 1             | 0           | -7.363848               | 4.234722  | 0.539176  |
| 42            | 6             | 0           | -6.035242               | 2.570170  | 0.265308  |
| 43            | 1             | 0           | -5.758158               | 2.529119  | 1.315900  |
| 44            | 6             | 0           | -4.854619               | -0.187064 | 1.483921  |
| 45            | 6             | 0           | -6.207906               | -0.497572 | 1.663362  |
| 46            | 1             | 0           | -6.924783               | -0.302192 | 0.869733  |
| 47            | 6             | 0           | -6.642935               | -1.041982 | 2.867235  |
| 48            | 1             | 0           | -7.692631               | -1.281019 | 3.004198  |
| 49            | 6             | 0           | -5.733727               | -1.266374 | 3.899994  |
| 50            | 1             | 0           | -6.077589               | -1.685962 | 4.840232  |
| 51            | 6             | 0           | -4.389839               | -0.943661 | 3.732229  |
| 52            | 1             | 0           | -3.684240               | -1.106654 | 4.540794  |
| 53            | 6             | 0           | -3.949266               | -0.405563 | 2.526593  |
| 54            | 1             | 0           | -2.901139               | -0.151524 | 2.388741  |

|     |   |   |           |           |           |
|-----|---|---|-----------|-----------|-----------|
| 55  | 6 | 0 | 6.115728  | 1.474615  | -0.244686 |
| 56  | 6 | 0 | 7.353998  | 0.829810  | -0.165932 |
| 57  | 1 | 0 | 7.408010  | -0.239716 | 0.021087  |
| 58  | 6 | 0 | 8.526711  | 1.559501  | -0.321193 |
| 59  | 1 | 0 | 9.487823  | 1.059496  | -0.256393 |
| 60  | 6 | 0 | 8.465460  | 2.931733  | -0.559648 |
| 61  | 1 | 0 | 9.382913  | 3.499143  | -0.682441 |
| 62  | 6 | 0 | 7.232943  | 3.573539  | -0.642620 |
| 63  | 1 | 0 | 7.186894  | 4.641819  | -0.830022 |
| 64  | 6 | 0 | 6.055361  | 2.848059  | -0.485236 |
| 65  | 1 | 0 | 5.083596  | 3.326886  | -0.548749 |
| 66  | 6 | 0 | 4.578939  | -0.721683 | -1.385041 |
| 67  | 6 | 0 | 3.896306  | -0.384839 | -2.558949 |
| 68  | 1 | 0 | 3.389155  | 0.574917  | -2.621741 |
| 69  | 6 | 0 | 3.880096  | -1.264242 | -3.637806 |
| 70  | 1 | 0 | 3.357821  | -0.991681 | -4.550053 |
| 71  | 6 | 0 | 4.536734  | -2.489303 | -3.548084 |
| 72  | 1 | 0 | 4.523887  | -3.176614 | -4.388604 |
| 73  | 6 | 0 | 5.220977  | -2.830274 | -2.382873 |
| 74  | 1 | 0 | 5.739794  | -3.781426 | -2.314420 |
| 75  | 6 | 0 | 5.247623  | -1.948413 | -1.306756 |
| 76  | 1 | 0 | 5.785276  | -2.223294 | -0.403444 |
| 77  | 6 | 0 | 4.708333  | -0.388866 | 1.500900  |
| 78  | 6 | 0 | 4.054394  | -1.612483 | 1.685611  |
| 79  | 1 | 0 | 3.559813  | -2.099526 | 0.848904  |
| 80  | 6 | 0 | 4.054011  | -2.230408 | 2.933386  |
| 81  | 1 | 0 | 3.561547  | -3.189499 | 3.059941  |
| 82  | 6 | 0 | 4.694065  | -1.625165 | 4.011150  |
| 83  | 1 | 0 | 4.698328  | -2.109871 | 4.982513  |
| 84  | 6 | 0 | 5.332420  | -0.398515 | 3.841105  |
| 85  | 1 | 0 | 5.831099  | 0.076481  | 4.680088  |
| 86  | 6 | 0 | 5.337170  | 0.218321  | 2.594818  |
| 87  | 1 | 0 | 5.836808  | 1.174901  | 2.468968  |
| 88  | 6 | 0 | 0.452234  | -2.515124 | 1.726622  |
| 89  | 1 | 0 | 1.237096  | -1.779272 | 1.937136  |
| 90  | 1 | 0 | -0.313209 | -2.364718 | 2.497487  |
| 91  | 6 | 0 | 1.013729  | -3.935005 | 1.802087  |
| 92  | 1 | 0 | 0.253380  | -4.688479 | 1.572076  |
| 93  | 1 | 0 | 1.381316  | -4.141884 | 2.811958  |
| 94  | 1 | 0 | 1.848437  | -4.077631 | 1.107577  |
| 95  | 6 | 0 | -1.560857 | -3.341347 | -0.204514 |
| 96  | 1 | 0 | -2.070225 | -3.065782 | -1.133702 |
| 97  | 1 | 0 | -1.038498 | -4.287158 | -0.393720 |
| 98  | 6 | 0 | -2.586799 | -3.511784 | 0.915989  |
| 99  | 1 | 0 | -2.126835 | -3.895927 | 1.832849  |
| 100 | 1 | 0 | -3.362528 | -4.221079 | 0.612160  |
| 101 | 1 | 0 | -3.079107 | -2.564327 | 1.156147  |
| 102 | 6 | 0 | 0.971673  | -2.360351 | -1.140228 |
| 103 | 1 | 0 | 1.874036  | -1.802255 | -0.864597 |
| 104 | 1 | 0 | 1.228632  | -3.425759 | -1.116234 |
| 105 | 6 | 0 | 0.521352  | -1.953319 | -2.544351 |
| 106 | 1 | 0 | -0.390010 | -2.481750 | -2.844058 |
| 107 | 1 | 0 | 1.303393  | -2.184820 | -3.271937 |
| 108 | 1 | 0 | 0.319824  | -0.876855 | -2.595563 |

-----  
PCM : SCF Done: E(RwB97XD) = -4726.77408248 A.U. after 21 cycles  
Convrg = 0.3541D-08 -V/T = 2.0035

PtEt3

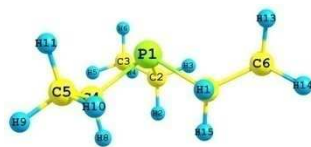

| Center Number | Atomic Number | Atomic Type | Coordinates (Angstroms) |           |           |
|---------------|---------------|-------------|-------------------------|-----------|-----------|
|               |               |             | X                       | Y         | Z         |
| 1             | 15            | 0           | -0.001662               | -0.002050 | -0.531358 |
| 2             | 6             | 0           | -0.897285               | 1.370345  | 0.348607  |
| 3             | 1             | 0           | -1.965554               | 1.247984  | 0.133309  |
| 4             | 6             | 0           | 1.633782                | 0.089598  | 0.349859  |
| 5             | 1             | 0           | 1.476061                | 0.030984  | 1.435988  |
| 6             | 1             | 0           | 2.055434                | 1.080401  | 0.141888  |
| 7             | 6             | 0           | 2.624784                | -0.984402 | -0.104571 |
| 8             | 1             | 0           | 3.587680                | -0.865105 | 0.403304  |
| 9             | 1             | 0           | 2.259839                | -1.993172 | 0.118242  |
| 10            | 1             | 0           | 2.802120                | -0.924499 | -1.183809 |
| 11            | 6             | 0           | -0.741258               | -1.462930 | 0.350696  |
| 12            | 1             | 0           | -0.097276               | -2.325455 | 0.140525  |
| 13            | 1             | 0           | -0.709988               | -1.297634 | 1.436814  |
| 14            | 6             | 0           | -2.169523               | -1.779583 | -0.100248 |
| 15            | 1             | 0           | -2.548031               | -2.673678 | 0.406330  |
| 16            | 1             | 0           | -2.856988               | -0.957551 | 0.127141  |
| 17            | 1             | 0           | -2.210597               | -1.959936 | -1.179956 |
| 18            | 6             | 0           | -0.451999               | 2.765060  | -0.097902 |
| 19            | 1             | 0           | 0.602045                | 2.948793  | 0.137255  |
| 20            | 1             | 0           | -0.579997               | 2.892328  | -1.178286 |
| 21            | 1             | 0           | -1.039544               | 3.540235  | 0.405409  |
| 22            | 1             | 0           | -0.775126               | 1.258617  | 1.435119  |

PCM :\_SCF Done: E(RwB97XD) = -578.944913714 A.U. after 13 cycles  
 Convq = 0.4111D-08 -V/T = 2.0028

## 1. References

1. J. Sandström, *Dynamic NMR Spectroscopy* Academic Press, 1982.
2. M. J. Frisch, G. W. Trucks, H. B. Schlegel, G. E. Scuseria, M. A. Robb, J. R. Cheeseman, G. Scalmani, V. Barone, B. Mennucci, G. A. Petersson, H. Nakatsuji, M. Caricato, X. Li, H. P. Hratchian, A. F. Izmaylov, J. Bloino, G. Zheng, J. L. Sonnenberg, M. Hada, M. Ehara, K. Toyota, R. Fukuda, J. Hasegawa, M. Ishida, T. Nakajima, Y. Honda, O. Kitao, H. Nakai, T. Vreven, J. A. M. Jr., J. E. Peralta, F. Ogliaro, M. Bearpark, J. J. Heyd, E. Brothers, K. N. Kudin, V. N. Staroverov, T. Keith, R. Kobayashi, J. Normand, K. Raghavachari, A. Rendell, J. C. Burant, S. S. Iyengar, J. Tomasi, M. Cossi, N. Rega, J. M. Millam, M. Klene, J. E. Knox, J. B. Cross, V. Bakken, C. Adamo, J. Jaramillo, R. Gomperts, R. E. Stratmann, O. Yazyev, A. J. Austin, R. Cammi, C. Pomelli, J. W. Ochterski, R. L. Martin, K. Morokuma, V. G. Zakrzewski, G. A. Voth, P. Salvador, J. J. Dannenberg, S. Dapprich, A. D. Daniels, O. Farkas, J. B. Foresman, J. V. Ortiz, J. Cioslowski and D. J. Fox, *Gaussian 09, Revision B.01*, (2010), Wallingford CT.
3. F. Weigend and R. Ahlrichs, *Phys. Chem. Chem. Phys.*, 2005, **7**, 3297-3305.
4. S. Miertus, E. Scrocco and J. Tomasi, *Chem. Phys.*, 1981, **55**, 117-129.
5. A. A. C. Braga, G. Ujaque and F. Maseras, *Organometallics*, 2006, **25**, 3647-3658.
